# Supplementary material for: Large-Scale Identification of Mirtrons in Arabidopsis and Rice
Source: PubMed Central journal article supplement (PMC3278437; doi:10.1371/journal.pone.0031163), 2012-02-13

GTAATAAAGACTGAAACTTTCC

GTAATAAAGACTGAAACTTTCCAGATC

GTAATAAAGACTGAAACTTTCCAGATCCAAATTCGTTAAAATTGAAATCAAATCTGATAAAGTTTGCTTCTTTGTTACAG

-17.10

((((( ((((((((((.....(((((((.....((((.....)))))).....)))))).....)))))).....)))))).. []

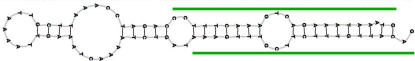

# AT4G27410.1-1

|                             | GSM642338 | GSM442934 | Total |
|-----------------------------|-----------|-----------|-------|
| GTAATAAAGACTGAAACTTTCC      | 0.2       | 0         | 0.2   |
| GTAATAAAGACTGAAACTTTCCAGATC | 0.05      | 0         | 0.05  |
| ATAAAGTTTGCTTCTTTGTTACAG    | 0         | 0.26      | 0.26  |
| AAAGTTTGCTTCTTTGTTACAG      | 0.6       | 0         | 0.6   |



# LOC\_Os02g52100.1-2

|                            |      |      |      |      |      |      |      |      |      |   |   |   |   |      |       |      |
|----------------------------|------|------|------|------|------|------|------|------|------|---|---|---|---|------|-------|------|
| ATTTCATGAGCCGCCTGAGTCGGT   | 0.44 | 0    | 0    | 0    | 0    | 0    | 0    | 0    | 0    | 0 | 0 | 0 | 0 | 0    | 0     | 0.44 |
| AAGAGGGAGCTGAGAGGATTTA     | 0    | 0.49 | 0    | 0    | 0    | 0    | 0    | 0    | 0    | 0 | 0 | 0 | 0 | 0    | 0     | 0.49 |
| CGCCCTGAGGCGGTTTGATACTGG   | 0.33 | 0    | 0    | 0    | 0    | 0    | 0    | 0    | 0    | 0 | 0 | 0 | 0 | 0    | 0     | 0.33 |
| TCCCTGAGTCGATTGCAATCTGGAC  | 0    | 0    | 0.70 | 0.12 | 0    | 0    | 0    | 0    | 0    | 0 | 0 | 0 | 0 | 0    | 0     | 0.42 |
| CTGAGTCGATTGCAATCTGAG      | 0    | 0    | 0    | 0    | 0.5  | 0    | 0    | 0    | 0    | 0 | 0 | 0 | 0 | 0    | 0     | 0.5  |
| CTGAGTCGCGTTTCAATCTGGAGCT  | 0    | 0    | 0    | 0    | 0.2  | 0.34 | 0    | 0    | 0    | 0 | 0 | 0 | 0 | 0    | 0     | 0.34 |
| CTGAGTCGATTGCAATCTGGAGCT   | 0    | 0    | 0    | 0.12 | 0.2  | 0    | 0    | 0    | 0    | 0 | 0 | 0 | 0 | 0    | 0     | 0.22 |
| CTGAGTCGCGTTGATATGAG       | 0    | 0    | 0    | 0.14 | 0.2  | 0    | 0    | 0    | 0    | 0 | 0 | 0 | 0 | 0    | 0     | 0.24 |
| CTGAGTCGCGTTTCAATCTGGAG    | 0    | 0    | 0    | 0    | 0    | 0    | 0.2  | 0    | 0    | 0 | 0 | 0 | 0 | 0    | 0     | 0.2  |
| CTGAGTCGATTGCAATCTGAG      | 0    | 0    | 0    | 0    | 0.2  | 0    | 0    | 0    | 0    | 0 | 0 | 0 | 0 | 0    | 0     | 0.2  |
| CTGAGTCGCGTTGATATGAGCG     | 0    | 0    | 0    | 0.16 | 0    | 0    | 0    | 0    | 0    | 0 | 0 | 0 | 0 | 0    | 0     | 0.16 |
| TGAGTCGATTGCAATCTGGAG      | 0    | 0    | 0    | 0.12 | 0    | 0    | 0    | 0    | 0    | 0 | 0 | 0 | 0 | 0    | 0     | 0.22 |
| TGAGTCGCGTTGATATGAGCGCT    | 0    | 0    | 0    | 0    | 0.2  | 0    | 0.2  | 0.44 | 0    | 0 | 0 | 0 | 0 | 0    | 0     | 0.74 |
| TGAGTCGATTGCAATCTGGAGGATTA | 0    | 0    | 0    | 0.12 | 0.2  | 0    | 0.2  | 0    | 0    | 0 | 0 | 0 | 0 | 0    | 0     | 0.42 |
| TGAGTCGCGTTGATATGAG        | 0    | 0    | 0    | 0.16 | 0    | 0    | 0    | 0    | 0    | 0 | 0 | 0 | 0 | 0    | 0     | 0.16 |
| GAGTCGATTGCAATCTGGAG       | 0    | 0    | 0    | 0.12 | 0.2  | 0    | 0    | 0    | 0    | 0 | 0 | 0 | 0 | 0    | 0     | 0.22 |
| GAGTCGATTGCAATCTGGAGCT     | 0    | 0    | 0    | 0.12 | 0.2  | 0    | 0    | 0    | 0    | 0 | 0 | 0 | 0 | 0    | 0     | 0.22 |
| GAGTCGCGTTGATATGAGCG       | 0    | 0    | 0    | 0.12 | 0    | 0.24 | 0    | 0    | 0.38 | 0 | 0 | 0 | 0 | 0    | 0     | 0.42 |
| GAGTCGATTGCAATCTGGAGCTTGG  | 0    | 0    | 0    | 0    | 0    | 0    | 0    | 0    | 0.27 | 0 | 0 | 0 | 0 | 0    | 0     | 0.27 |
| AGTCGATTGCAATCTGGAGGATTA   | 0    | 0    | 0    | 0    | 0    | 0    | 0.2  | 0    | 0    | 0 | 0 | 0 | 0 | 0    | 0     | 0.2  |
| AGTCGATTGCAATCTGGAGCTTGG   | 0.34 | 0    | 0    | 0    | 0    | 0    | 0    | 0    | 0    | 0 | 0 | 0 | 0 | 0.12 | 17.53 | 0.44 |
| TCTGTCGAGGTTTACAGAGAGAG    | 0    | 0    | 0    | 0    | 0.2  | 0    | 0    | 0    | 0    | 0 | 0 | 0 | 0 | 0.12 | 0.48  | 0.58 |
| AGCCCTACCCCTATTTAGCTCC     | 0    | 0    | 0    | 0    | 0.12 | 0    | 0    | 0    | 0    | 0 | 0 | 0 | 0 | 0    | 0     | 0.22 |
| GGCCCTACCCCTATTTAGCTCC     | 0    | 0    | 0    | 0    | 0    | 0    | 0.34 | 0    | 0    | 0 | 0 | 0 | 0 | 0    | 0     | 0.34 |
| TAAAGTCCTCAGAGCCTGCGAGC    | 0    | 0    | 0    | 0    | 0    | 0    | 0    | 0    | 0    | 0 | 0 | 0 | 0 | 0    | 0.26  | 0.26 |
| TAAAGTCCTCAGAGCCTGCGAG     | 0    | 0    | 0    | 0    | 0    | 0    | 0    | 0    | 0    | 0 | 0 | 0 | 0 | 0    | 0.26  | 0.26 |
| AGAGTCCTCAGAGCCTGCGAGATC   | 0.25 | 0    | 0.70 | 0    | 0    | 0    | 0    | 0    | 0    | 0 | 0 | 0 | 0 | 0    | 0.48  | 0.55 |
| ATGCTCAGAGCCTGCGAGGCTTT    | 0.44 | 0    | 0    | 0    | 0    | 0    | 0    | 0    | 0    | 0 | 0 | 0 | 0 | 0    | 0     | 0.44 |
| TCTCGAGCCTTACTTGGACAG      | 0    | 0    | 0    | 0.12 | 0    | 0    | 0    | 0    | 0    | 0 | 0 | 0 | 0 | 0.26 | 0     | 0.26 |
| CGAGTCCTTACTTGGACAGAG      | 0    | 0    | 0    | 0    | 0.2  | 0    | 0    | 0    | 0    | 0 | 0 | 0 | 0 | 0    | 0.48  | 0.48 |
| CGGTCCTTACTTGGACAG         | 0    | 0    | 0    | 0    | 0    | 0    | 0    | 0    | 0    | 0 | 0 | 0 | 0 | 0    | 0     | 0.2  |

ATTTCATGAGCCGCCTGAGTCGGTCTGAGTCGATTGCAATCTGGAGCTGAGTCGCGTTGATATGAGCGCTACCCCTATTTAGCTCCGCTCAGAGCCTGCGAGCCTTACTTGGACAG

.....410.....41101101.....101...41.....10110101.....2019.....11019.....19.....201919.....211911119.....

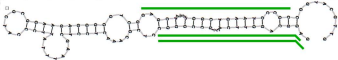

# LOC\_Os03g06520.1-6

| Sequence              | 000044 | 000048 | 000052 | 000056 | 000060 | 000064 | 000068 | 000072 | 000076 | 000080 | 000084 | 000088 | 000092 | 000096 | 000100 |
|-----------------------|--------|--------|--------|--------|--------|--------|--------|--------|--------|--------|--------|--------|--------|--------|--------|
| CTATGACATTCGCGTACGAGG | 0.4    | 0.2    | 0.4    | 0      | 0      | 0      | 0      | 0      | 0      | 0      | 0      | 0      | 0      | 0      | 0      |
| CTATGACATTCGCGTACGAGG | 0.2    | 0      | 0      | 0      | 0      | 0      | 0      | 0      | 0      | 0      | 0      | 0      | 0      | 0      | 0      |
| CTATGACATTCGCGTACGAGG | 0      | 0.2    | 0      | 0.22   | 0      | 0.18   | 0      | 0      | 0      | 0      | 0      | 0      | 0      | 0      | 0.22   |
| CTATGACATTCGCGTACGAGG | 0.4    | 0      | 0.8    | 0      | 0.22   | 0.18   | 0      | 0      | 0      | 0      | 0      | 0      | 0      | 0      | 1.08   |
| CTATGACATTCGCGTACGAGG | 0      | 0.48   | 0      | 0      | 0      | 0      | 0      | 0      | 0      | 0      | 0      | 0      | 0      | 0      | 0.48   |
| CTATGACATTCGCGTACGAGG | 0      | 0      | 0      | 0.22   | 0      | 0      | 0      | 0      | 0      | 0      | 0      | 0      | 0      | 0      | 0.22   |
| CTATGACATTCGCGTACGAGG | 0      | 0.2    | 0      | 0      | 0      | 0      | 0      | 0      | 0      | 0      | 0      | 0      | 0      | 0      | 0.2    |
| CTATGACATTCGCGTACGAGG | 0      | 0      | 0      | 0      | 0      | 0.18   | 0      | 0      | 0      | 0      | 0      | 0      | 0      | 0      | 0.18   |
| CTATGACATTCGCGTACGAGG | 0      | 0      | 0.8    | 0      | 0      | 0.18   | 0.27   | 0      | 0      | 0      | 0      | 0      | 0      | 0      | 1.08   |
| CTATGACATTCGCGTACGAGG | 0      | 0.2    | 0      | 0      | 0      | 0      | 0      | 0      | 0      | 0      | 0      | 0      | 0      | 0      | 0.2    |
| CTATGACATTCGCGTACGAGG | 0      | 0      | 0.78   | 0      | 0.22   | 0.18   | 0      | 0      | 0      | 0      | 0      | 0      | 0      | 0      | 1.08   |
| CTATGACATTCGCGTACGAGG | 0.2    | 0      | 0      | 0      | 0      | 0      | 0      | 0      | 0      | 0      | 0      | 0      | 0      | 0      | 0.2    |
| CTATGACATTCGCGTACGAGG | 0      | 0      | 0.78   | 0      | 0.22   | 0.22   | 0      | 0      | 0      | 0      | 0      | 0      | 0      | 0      | 1.48   |
| CTATGACATTCGCGTACGAGG | 0      | 0      | 0.28   | 0      | 0      | 0      | 0      | 0      | 0      | 0      | 0      | 0      | 0      | 0      | 0.28   |
| CTATGACATTCGCGTACGAGG | 0      | 0      | 0      | 0      | 0      | 0      | 0      | 0.22   | 0      | 0      | 0      | 0      | 0      | 0      | 0.22   |
| CTATGACATTCGCGTACGAGG | 0.2    | 0.2    | 0.22   | 0      | 0.22   | 0      | 0      | 0      | 0.22   | 0      | 0      | 0      | 0      | 0      | 0.22   |
| CTATGACATTCGCGTACGAGG | 0.28   | 0.2    | 0.22   | 0      | 0      | 0      | 0.72   | 0.48   | 0.22   | 0      | 0      | 0      | 0      | 0      | 18.27  |
| CTATGACATTCGCGTACGAGG | 0      | 0      | 0      | 0      | 0      | 0      | 0      | 0      | 0      | 0      | 0      | 0      | 0      | 0      | 0      |
| CTATGACATTCGCGTACGAGG | 0      | 0.2    | 0      | 0      | 0      | 0      | 0      | 0      | 0      | 0      | 0      | 0      | 0      | 0      | 0.2    |
| CTATGACATTCGCGTACGAGG | 0      | 0      | 0      | 0      | 0      | 0.18   | 0      | 0      | 0      | 0      | 0      | 0      | 0      | 0      | 0.18   |
| CTATGACATTCGCGTACGAGG | 0      | 0      | 0.28   | 0      | 0      | 0      | 0      | 0      | 0      | 0      | 0      | 0      | 0      | 0      | 0.28   |
| CTATGACATTCGCGTACGAGG | 0      | 0      | 0      | 0      | 0      | 0.22   | 0      | 0      | 0      | 0      | 0      | 0      | 0      | 0      | 0.22   |
| CTATGACATTCGCGTACGAGG | 0.2    | 0      | 0      | 0      | 0      | 0      | 0      | 0      | 0      | 0      | 0      | 0      | 0      | 0      | 0.2    |
| CTATGACATTCGCGTACGAGG | 0      | 0      | 0.28   | 0      | 0      | 0      | 0      | 0      | 0      | 0      | 0      | 0      | 0      | 0      | 0.28   |
| CTATGACATTCGCGTACGAGG | 0      | 0      | 0.22   | 0      | 0      | 0      | 0      | 0      | 0      | 0      | 0      | 0      | 0      | 0      | 0.22   |
| CTATGACATTCGCGTACGAGG | 0      | 0.2    | 0      | 0      | 0      | 0      | 0      | 0      | 0      | 0      | 0      | 0      | 0      | 0      | 0.2    |
| CTATGACATTCGCGTACGAGG | 0      | 0      | 0.78   | 0      | 0      | 0      | 0      | 0      | 0      | 0      | 0      | 0      | 0      | 0      | 0.78   |
| CTATGACATTCGCGTACGAGG | 0.2    | 0      | 0      | 0      | 0      | 0      | 0      | 0      | 0      | 0      | 0      | 0      | 0      | 0      | 0.2    |
| CTATGACATTCGCGTACGAGG | 0      | 0      | 0.28   | 0      | 0      | 0      | 0      | 0      | 0      | 0      | 0      | 0      | 0      | 0      | 0.28   |
| CTATGACATTCGCGTACGAGG | 0      | 0      | 0      | 0      | 0      | 0      | 0      | 0      | 0      | 0      | 0      | 0      | 0      | 0      | 0      |
| CTATGACATTCGCGTACGAGG | 0      | 0      | 0.28   | 0      | 0      | 0      | 0      | 0      | 0      | 0      | 0      | 0      | 0      | 0      | 0.28   |
| CTATGACATTCGCGTACGAGG | 0      | 0      | 0      | 0      | 0      | 0      | 0      | 0      | 0      | 0      | 0      | 0      | 0      | 0      | 0      |
| CTATGACATTCGCGTACGAGG | 0      | 0      | 0.28   | 0      | 0      | 0      | 0      | 0      | 0      | 0      | 0      | 0      | 0      | 0      | 0.28   |
| CTATGACATTCGCGTACGAGG | 0      | 0      | 0      | 0      | 0      | 0      | 0      | 0      | 0      | 0      | 0      | 0      | 0      | 0      | 0      |
| CTATGACATTCGCGTACGAGG | 0      | 0      | 0.28   | 0      | 0      | 0      | 0      | 0      | 0      | 0      | 0      | 0      | 0      | 0      | 0.28   |
| CTATGACATTCGCGTACGAGG | 0      | 0      | 0      | 0      | 0      | 0      | 0      | 0      | 0      | 0      | 0      | 0      | 0      | 0      | 0      |
| CTATGACATTCGCGTACGAGG | 0      | 0      | 0.28   | 0      | 0      | 0      | 0      | 0      | 0      | 0      | 0      | 0      | 0      | 0      | 0.28   |

-27.28 10011111...1110001...10011...4111...1110001111...2111001111001... 11

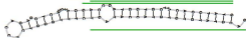







# LOC\_Os04g09380.1-5

|                          | OS04G0268 | OS04G0270 | OS04G1478 | OS04G1852 | OS04G1853 | OS04G2043 | OS04G2047 | OS04G2049 | OS04G2050 | OS04G2052 | OS04G2053 | Total |
|--------------------------|-----------|-----------|-----------|-----------|-----------|-----------|-----------|-----------|-----------|-----------|-----------|-------|
| TCACCCGCGTGGTATGATCCAGAA | 0.75      | 1.1       | 3.49      | 0.33      | 0.92      | 0         | 0         | 0         | 0         | 0         | 0         | 3.58  |
| TCGAGCGCGTGGTATGATCCAGC  | 0.11      | 0.2       | 0         | 0         | 0         | 0         | 0         | 0         | 0         | 0         | 0         | 0.31  |
| TCACCCGCGTGGTATGATCCAGAA | 0.11      | 0.2       | 0         | 0         | 0         | 0         | 0         | 0         | 0         | 0         | 0         | 0.31  |
| TCGAGCGCGTGGTATGATCCAGC  | 0.11      | 0         | 0         | 0         | 0         | 0         | 0         | 0         | 0         | 0         | 0         | 0.31  |
| TCACCCGCGTGGTATGATCCAGAA | 0.22      | 0         | 0         | 0.33      | 0         | 0         | 0         | 0         | 0         | 0         | 0         | 0.55  |
| TCGAGCGCGTGGTATGATCCAGC  | 0.11      | 0         | 0         | 0         | 0         | 0         | 0         | 0         | 0         | 0         | 0         | 0.31  |
| TCACCCGCGTGGTATGATCCAGAA | 0         | 0         | 0         | 0         | 0.31      | 0         | 0         | 0         | 0         | 0         | 0         | 0.31  |
| TCGAGCGCGTGGTATGATCCAGC  | 0.33      | 0         | 0         | 0.33      | 0         | 0         | 0         | 0         | 0         | 0         | 0         | 0.66  |
| CACCCGCGTGGTATGATCCAGAAC | 0.11      | 0         | 0         | 0         | 0         | 0         | 0         | 0         | 0         | 0         | 0         | 0.31  |
| CACCGTGGTATGATCCAGAAC    | 0         | 0         | 0         | 0         | 0.31      | 0         | 0         | 0         | 0         | 0         | 0         | 0.31  |
| CACGCGTGGTATGATCCAGAAC   | 0         | 0         | 0         | 0         | 0.31      | 0         | 0         | 0         | 0         | 0         | 0         | 0.31  |
| ACAGTATCGAGAACGAAATTTGG  | 0         | 0.2       | 0         | 0         | 0         | 0         | 0         | 0         | 0         | 0         | 0         | 0.2   |
|                          | 0         | 0         | 0         | 0         | 0         | 3.16      | 0         | 0         | 0         | 0         | 0         | 3.16  |
| AAGATATTTCTGCACTCTTCAG   | 0         | 0         | 0         | 0         | 0         | 0         | 3.22      | 0         | 0         | 0         | 0         | 3.22  |
| ATGATTCAGTTTCAAGCTTCAAGC | 0         | 0         | 0         | 0         | 0         | 0         | 0         | 0.37      | 0.3       | 0         | 0         | 0.67  |
| GATCATTTCAAGCCTTCAAGCTTC | 0         | 0         | 0         | 0         | 0         | 3.16      | 0         | 0         | 0         | 0         | 0         | 3.16  |
| TACTCTTCAAGCCTTCAAGCCTTC | 0         | 0         | 0         | 0         | 0         | 0         | 0         | 0         | 3.08      | 0         | 0         | 3.08  |
| ACTATTCAGGACTTCAAGCCTTC  | 0         | 0         | 0         | 0         | 0         | 3.16      | 0         | 1.47      | 0         | 0         | 0.34      | 2.57  |

12,681 118,000 118,000 118,000 118,000 140,000 211,000 211,000 211,000 211,000 211,000 211,000

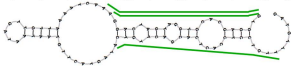









LOC\_Os07g12850.1-2

- LOC102321781
- LOC102321782
- LOC102321783
- LOC102321784
- LOC102321785
- LOC102321786
- LOC102321787
- LOC102321788
- LOC102321789
- LOC102321790
- LOC102321791
- LOC102321792
- LOC102321793
- LOC102321794
- LOC102321795
- LOC102321796
- LOC102321797
- LOC102321798
- LOC102321799
- LOC102321800
- LOC102321801
- LOC102321802
- LOC102321803
- LOC102321804
- LOC102321805
- LOC102321806
- LOC102321807
- LOC102321808
- LOC102321809
- LOC102321810
- LOC102321811
- LOC102321812
- LOC102321813
- LOC102321814
- LOC102321815
- LOC102321816
- LOC102321817
- LOC102321818
- LOC102321819
- LOC102321820
- LOC102321821
- LOC102321822
- LOC102321823
- LOC102321824
- LOC102321825
- LOC102321826
- LOC102321827
- LOC102321828
- LOC102321829
- LOC102321830
- LOC102321831
- LOC102321832
- LOC102321833
- LOC102321834
- LOC102321835
- LOC102321836
- LOC102321837
- LOC102321838
- LOC102321839
- LOC102321840
- LOC102321841
- LOC102321842
- LOC102321843
- LOC102321844
- LOC102321845
- LOC102321846
- LOC102321847
- LOC102321848
- LOC102321849
- LOC102321850
- LOC102321851
- LOC102321852
- LOC102321853
- LOC102321854
- LOC102321855
- LOC102321856
- LOC102321857
- LOC102321858
- LOC102321859
- LOC102321860
- LOC102321861
- LOC102321862
- LOC102321863
- LOC102321864
- LOC102321865
- LOC102321866
- LOC102321867
- LOC102321868
- LOC102321869
- LOC102321870
- LOC102321871
- LOC102321872
- LOC102321873
- LOC102321874
- LOC102321875
- LOC102321876
- LOC102321877
- LOC102321878
- LOC102321879
- LOC102321880
- LOC102321881
- LOC102321882
- LOC102321883
- LOC102321884
- LOC102321885
- LOC102321886
- LOC102321887
- LOC102321888
- LOC102321889
- LOC102321890
- LOC102321891
- LOC102321892
- LOC102321893
- LOC102321894
- LOC102321895
- LOC102321896
- LOC102321897
- LOC102321898
- LOC102321899
- LOC102321900
- LOC102321901
- LOC102321902
- LOC102321903
- LOC102321904
- LOC102321905
- LOC102321906
- LOC102321907
- LOC102321908
- LOC102321909
- LOC102321910
- LOC102321911
- LOC102321912
- LOC102321913
- LOC102321914
- LOC102321915
- LOC102321916
- LOC102321917
- LOC102321918
- LOC102321919
- LOC102321920
- LOC102321921
- LOC102321922
- LOC102321923
- LOC102321924
- LOC102321925
- LOC102321926
- LOC102321927
- LOC102321928
- LOC102321929
- LOC102321930
- LOC102321931
- LOC102321932
- LOC102321933
- LOC102321934
- LOC102321935
- LOC102321936
- LOC102321937
- LOC102321938
- LOC102321939
- LOC102321940
- LOC102321941
- LOC102321942
- LOC102321943
- LOC102321944
- LOC102321945
- LOC102321946
- LOC102321947
- LOC102321948
- LOC102321949
- LOC102321950
- LOC102321951
- LOC102321952
- LOC102321953
- LOC102321954
- LOC102321955
- LOC102321956
- LOC102321957
- LOC102321958
- LOC102321959
- LOC102321960
- LOC102321961
- LOC102321962
- LOC102321963
- LOC102321964
- LOC102321965
- LOC102321966
- LOC102321967
- LOC102321968
- LOC102321969
- LOC102321970
- LOC102321971
- LOC102321972
- LOC102321973
- LOC102321974
- LOC102321975
- LOC102321976
- LOC102321977
- LOC102321978
- LOC102321979
- LOC102321980
- LOC102321981
- LOC102321982
- LOC102321983
- LOC102321984
- LOC102321985
- LOC102321986
- LOC102321987
- LOC102321988
- LOC102321989
- LOC102321990
- LOC102321991
- LOC102321992
- LOC102321993
- LOC102321994
- LOC102321995
- LOC102321996
- LOC102321997
- LOC102321998
- LOC102321999

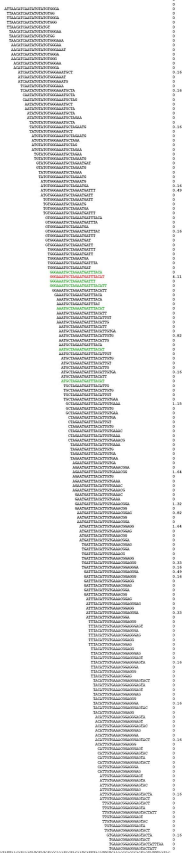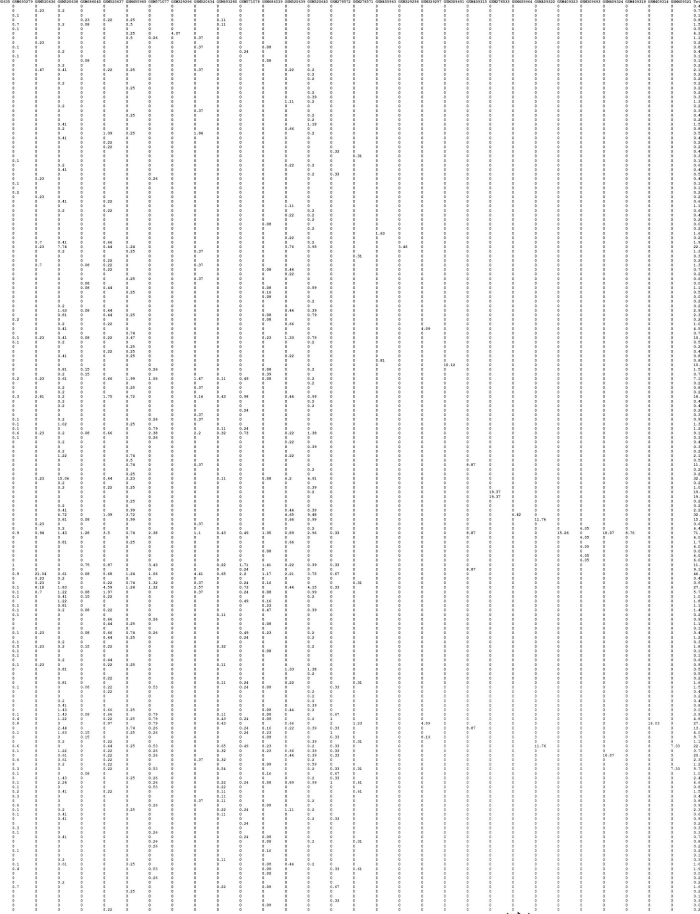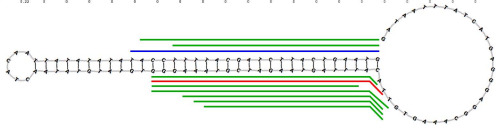







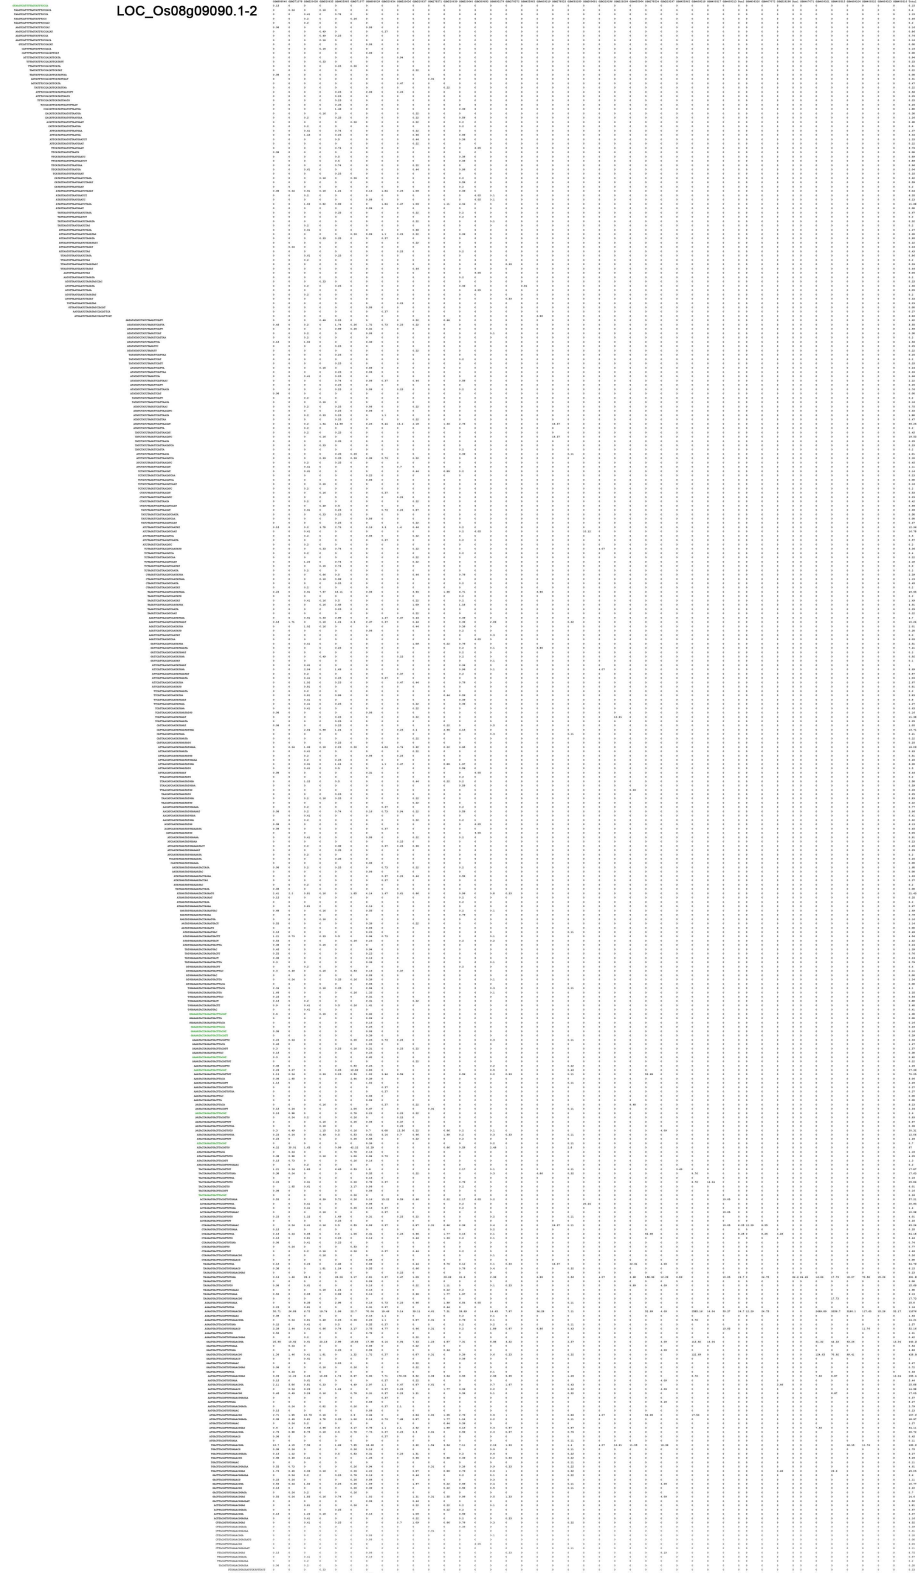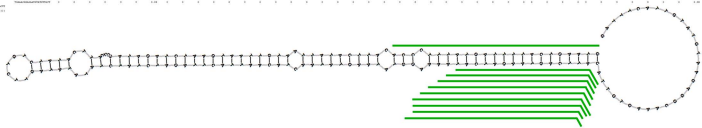

GTAAATTGAACAAAATCATCAACA

# LOC\_Os08g42590.1-4

TTGATGCTGATTTTGCGCATTTCGTAG  
TGATGCTGATTTTGCGCATTTCGTAG  
GATGCTGATTTTGCGCATTTCGTAG  
GCTGATTTTGCGCATTTCGTA

|                             | GSM520637 | GSM520638 | GSM520640 | GSM455965 | Total |
|-----------------------------|-----------|-----------|-----------|-----------|-------|
| GTAAATTGAACAAAATCATCAACA    | 0.66      | 0         | 0         | 0         | 0.66  |
| TTGATGCTGATTTTGCGCATTTCGTAG | 0         | 0.2       | 0.59      | 0.25      | 1.04  |
| TGATGCTGATTTTGCGCATTTCGTAG  | 0         | 0.41      | 0.2       | 0         | 0.61  |
| GATGCTGATTTTGCGCATTTCGTAG   | 0.22      | 0         | 0.2       | 0         | 0.42  |
| GCTGATTTTGCGCATTTCGTA       | 0         | 0         | 0.2       | 0         | 0.2   |

GTAAATTGAACAAAATCATCAACATGGTTTCATGCCCATTTCTTGCAATCTTGTATGCTGATTTTGCGCATTTCGTAG

-12.80 .(((.(.(.(((((((.(.(.(.(. ....))))) -)) -)) -)))))... [ ]

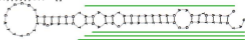

**CAGAGCCAGTTTGATTATGCCG** **LOC\_Os09g04260.1-13**

| OSM686040 | OSM693279 | OSM329296 | Total |
|-----------|-----------|-----------|-------|
| 0.08      | 0         | 0         | 0.08  |
| 0         | 0.1       | 0         | 0.1   |
| 0         | 0         | 8.15      | 8.15  |

ATGCCTTGATCAAGCAATCT

**CCTTGATCAAGCAATCTGGAG**

GTGCAGAAATTCAGAGCCAGTTTGATTATGCCGTTACAACATGCCTTGATCAAGCAATCTGGAG

-12.20 ..... (((. (((. .... ((((((((( (. (( ..... )) ..))) )))) ..) )))))- []

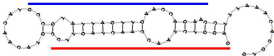

# LOC\_Os11g26670.1-2

|                        | OSM696940 | OSM696019 | OSM278573 | OSM55945 | OSM520635 | OSM520638 | OSM693279 | OSM571077 | Total |
|------------------------|-----------|-----------|-----------|----------|-----------|-----------|-----------|-----------|-------|
| GTAGAGAGCAATTAGTAGCTT  | 0.08      | 0.08      | 0.33      | 0        | 0         | 0         | 0         | 0         | 0.49  |
| GTAGAGAGCAATTAGTAGCTT* | 0         | 0         | 0         | 0.25     | 0         | 0         | 0         | 0         | 0.25  |
| TAGAGAGCAATTAGTAGCTT   | 0         | 0         | 0         | 0        | 0.16      | 0         | 0         | 0         | 0.16  |
| TAGAGAGCAATTAGTAGCT    | 0         | 0         | 0         | 0        | 0         | 0.2       | 0         | 0         | 0.2   |
| GACAGCAATTAGTAGCTT     | 0         | 0         | 0         | 0        | 0         | 0         | 0.1       | 0         | 0.1   |
| TCTTCGTTTGTTTTCTACTAG  | 0         | 0         | 0         | 0        | 0         | 0         | 0         | 0.26      | 0.26  |

GTAGAGAGCAATTAGTAGCTTACGTGTGTGTTCTTCTGCTTTTGTTTTCTACTAG

-11.90 (((((((((((---(((((---(((...)))...)))...)))...)))...)))... ))

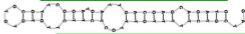

Supplement: pone.0031163.s002.pdf [file pone.0031163.s002.pdf]
