# Supplementary material for: Large-Scale Identification of Mirtrons in Arabidopsis and Rice
Source: PubMed Central journal article supplement (PMC3278437; doi:10.1371/journal.pone.0031163), 2012-02-13

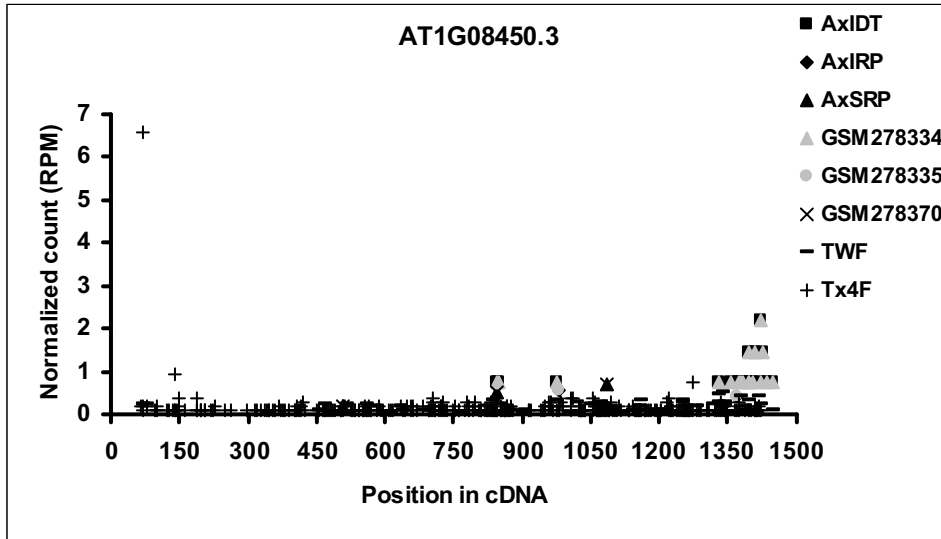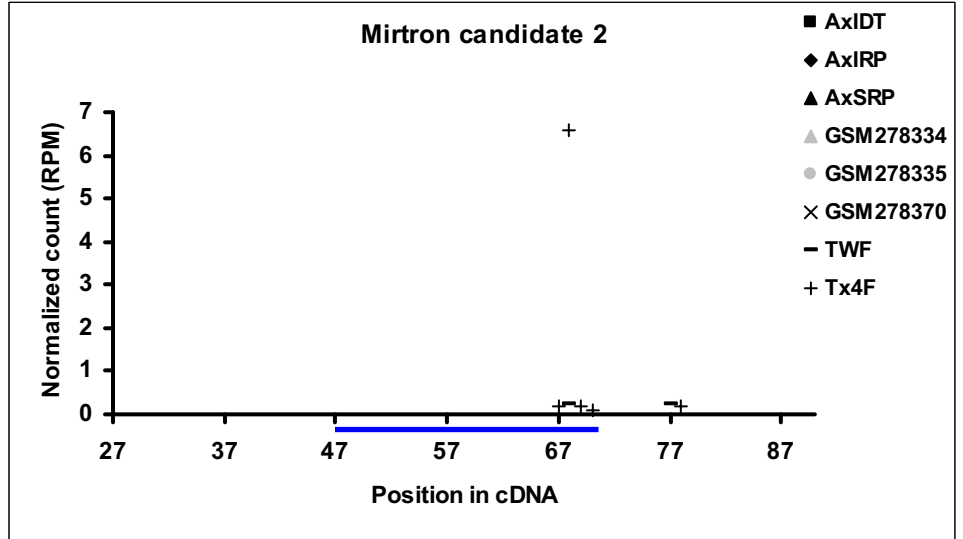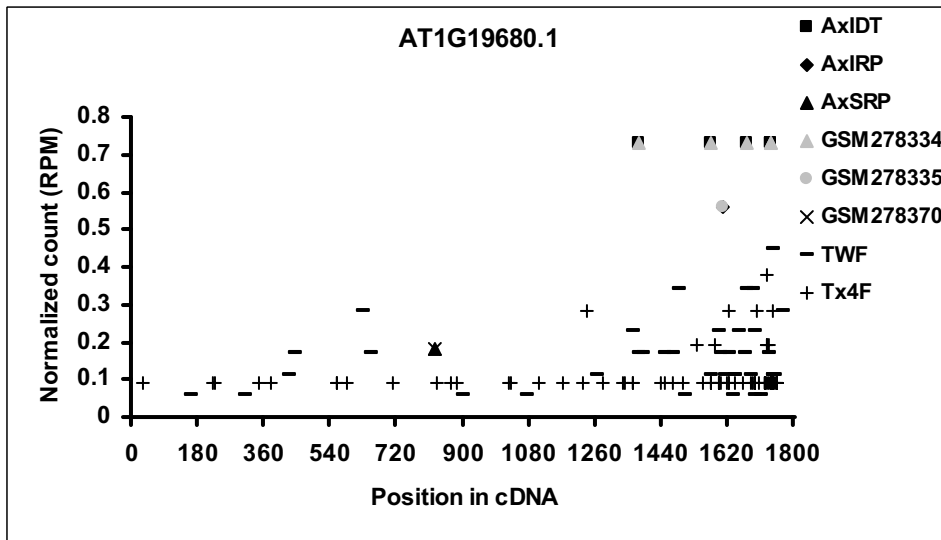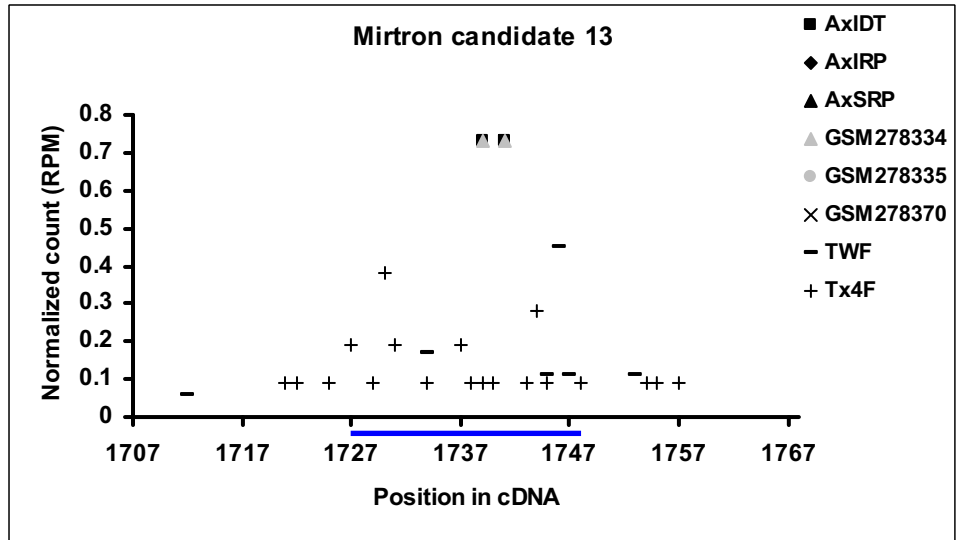

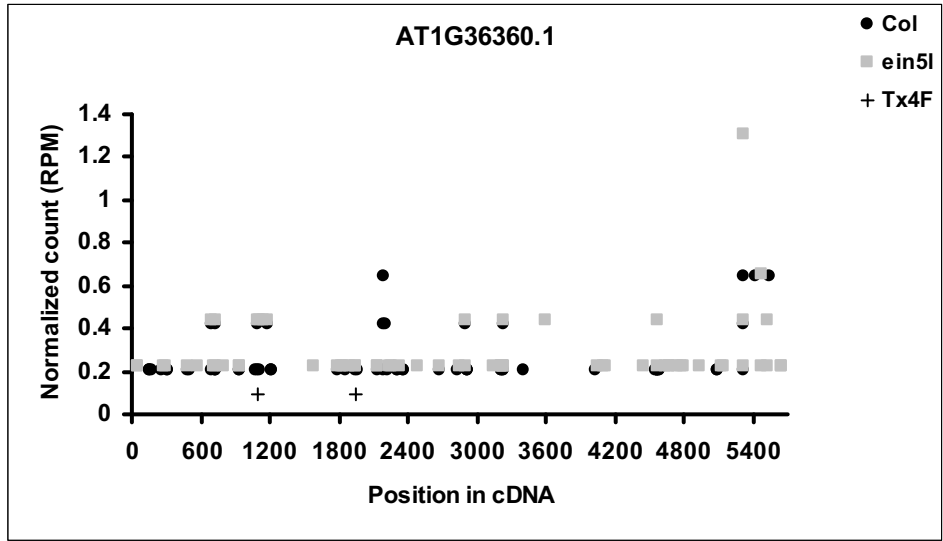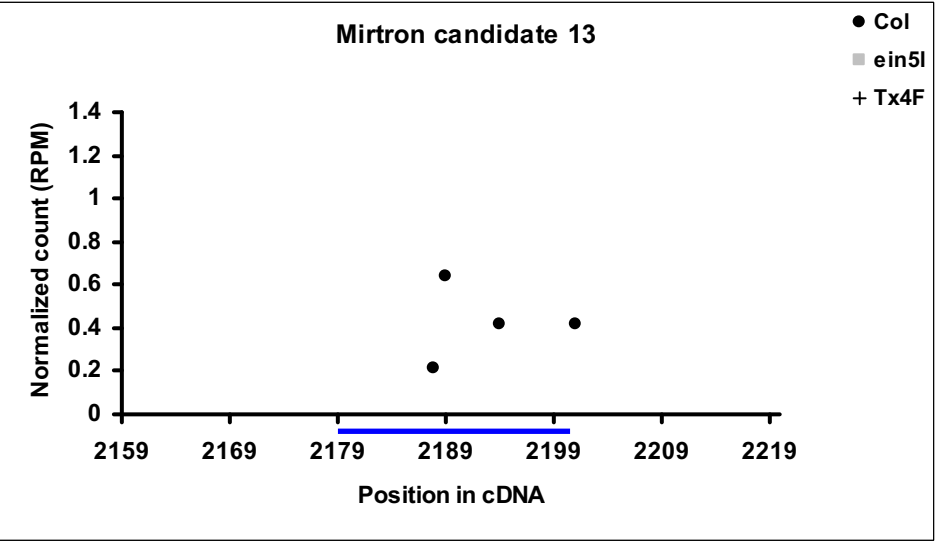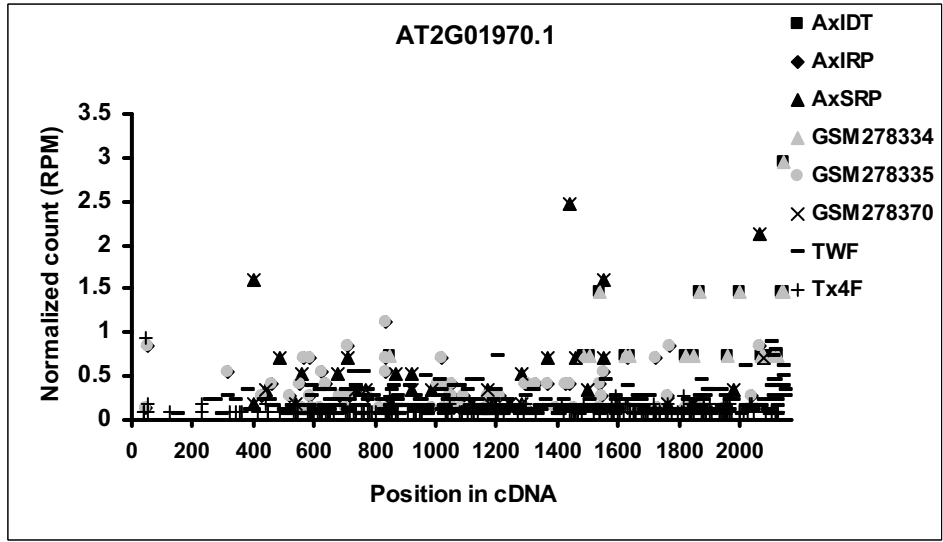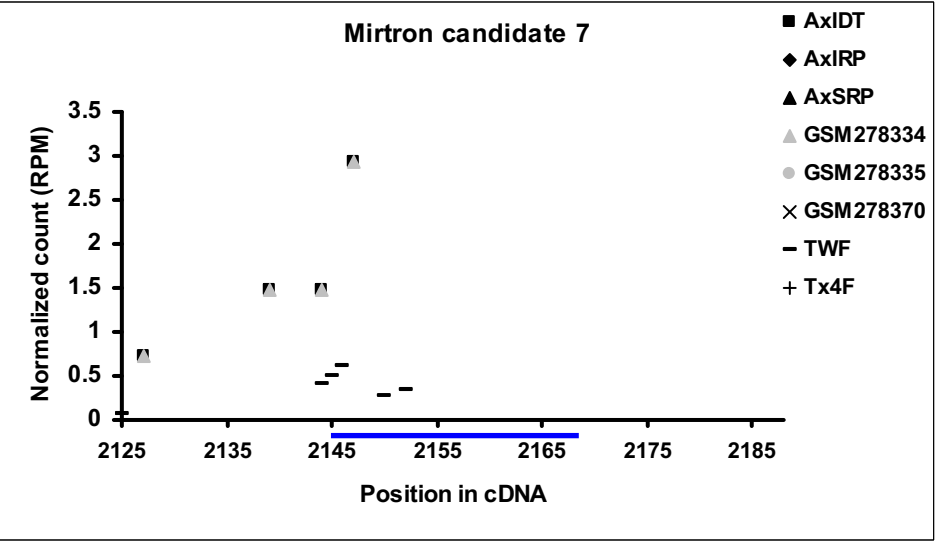

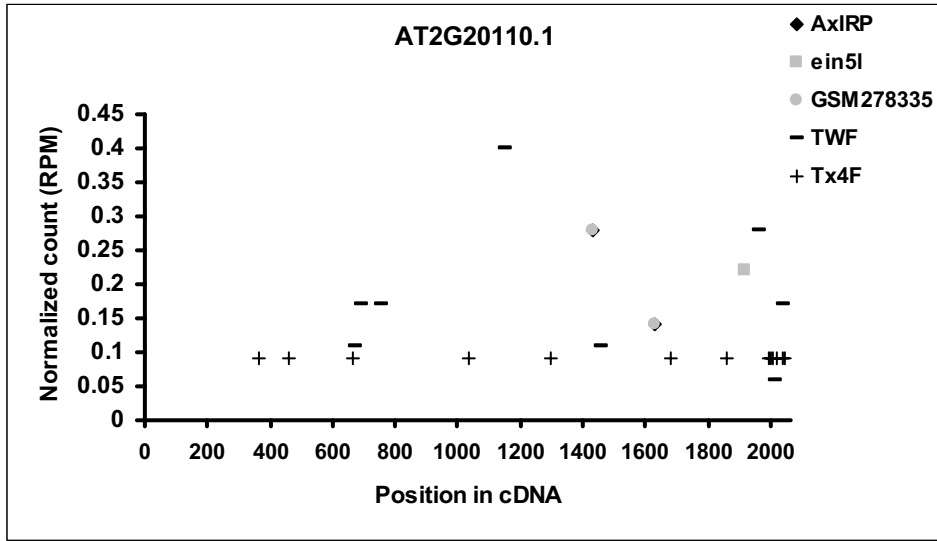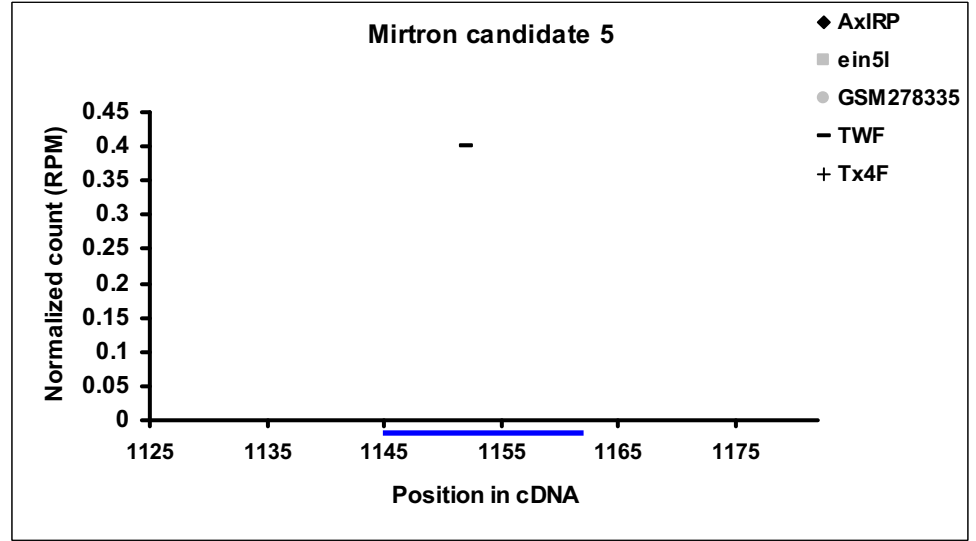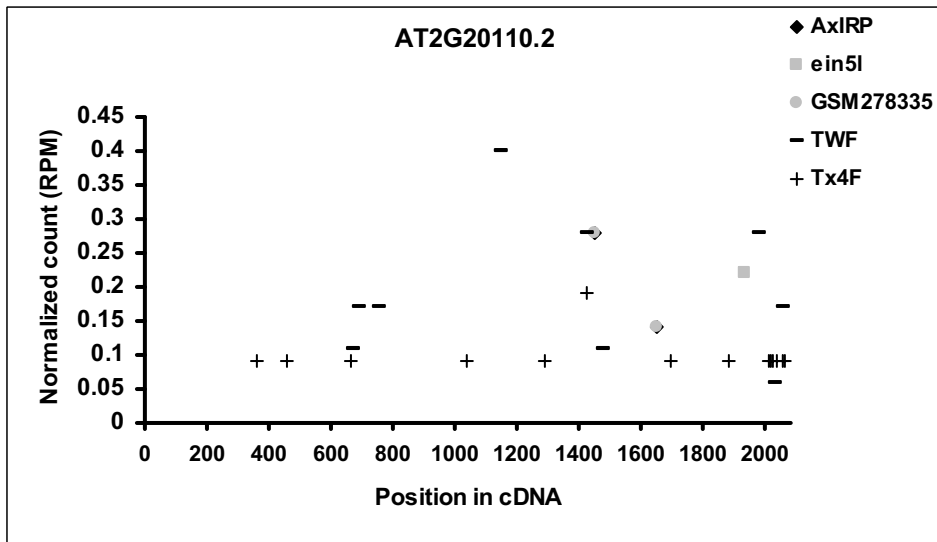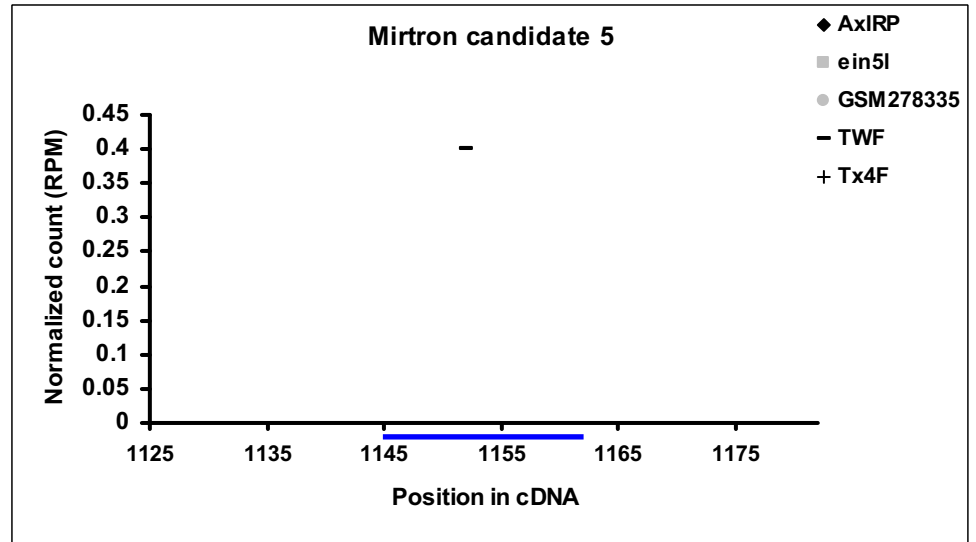

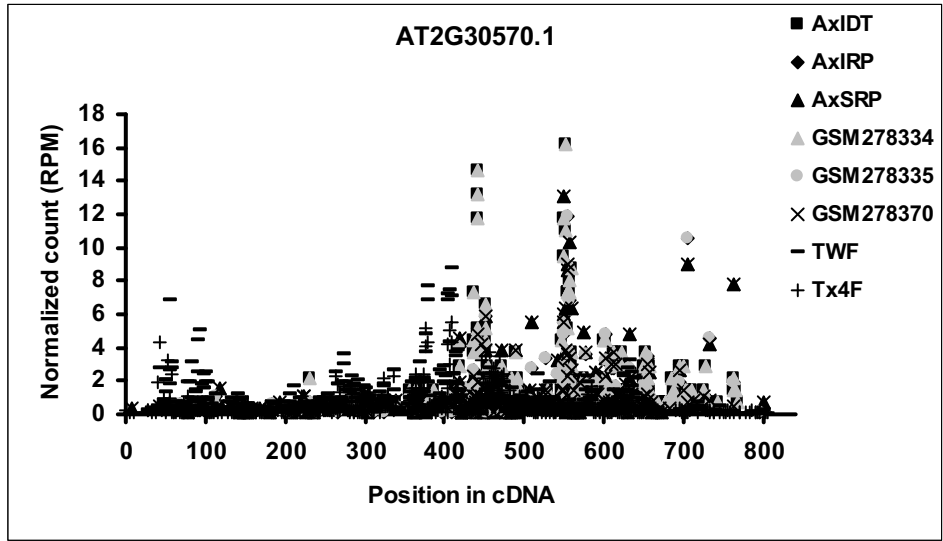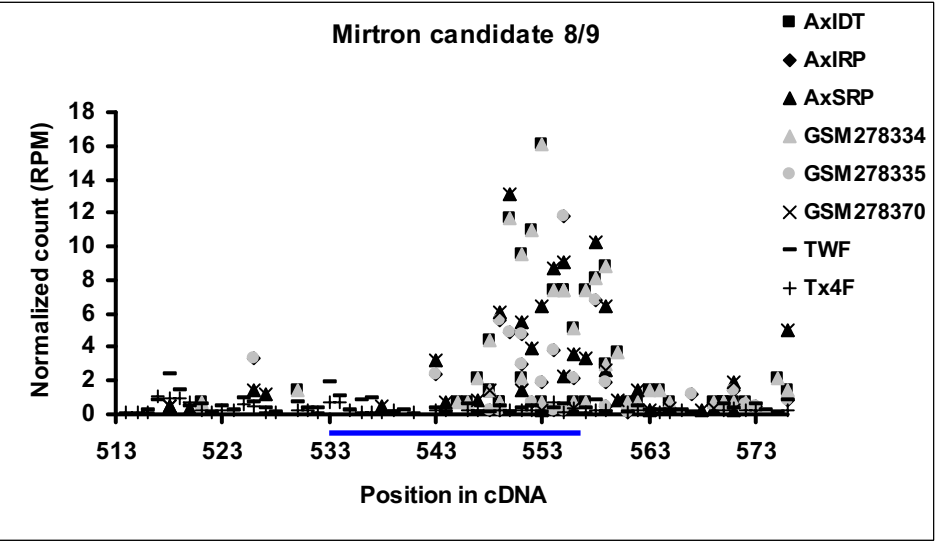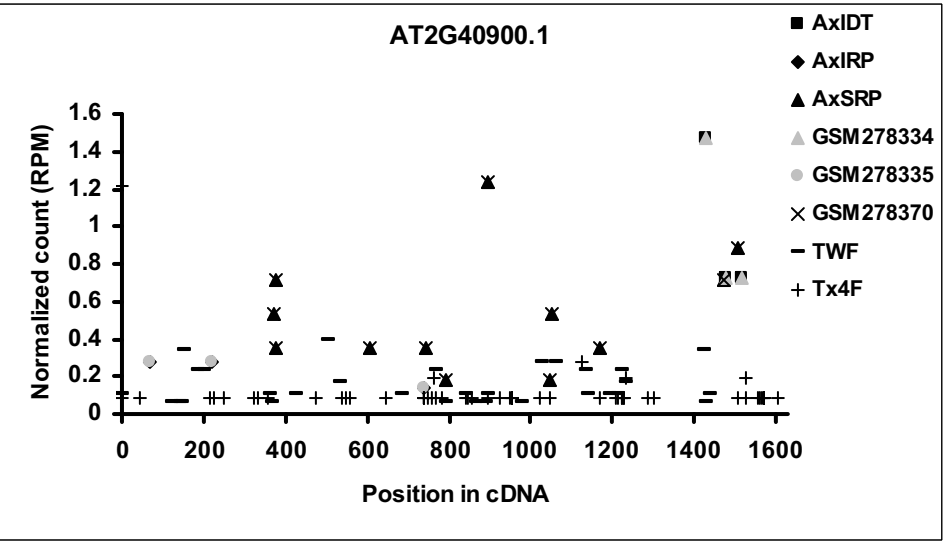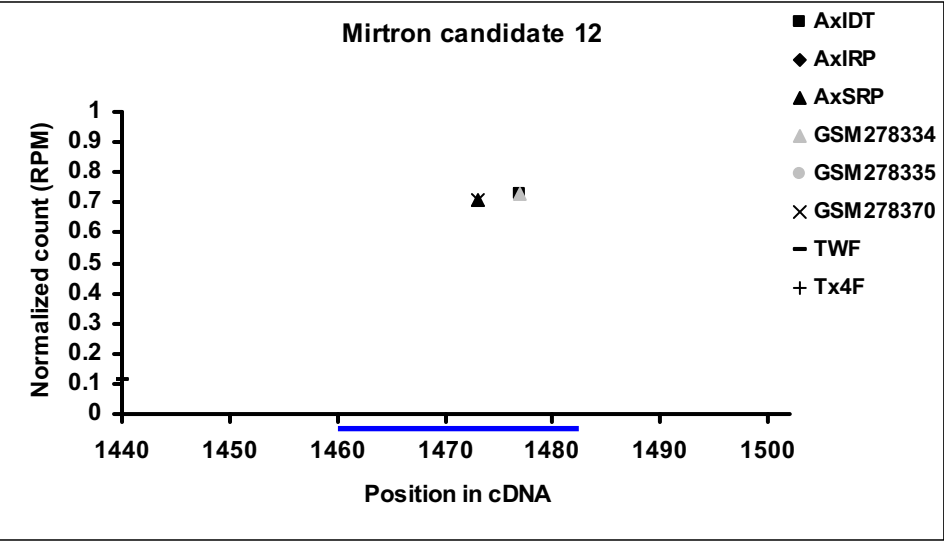

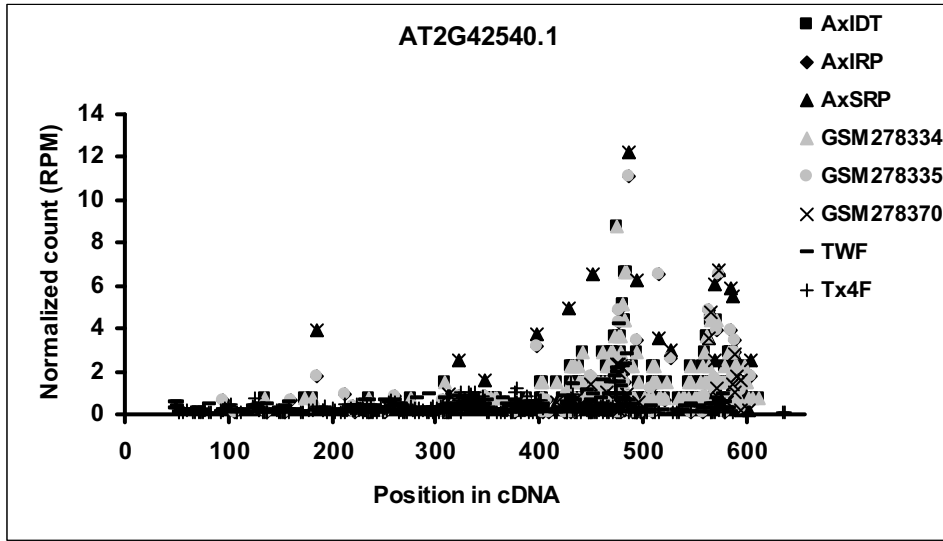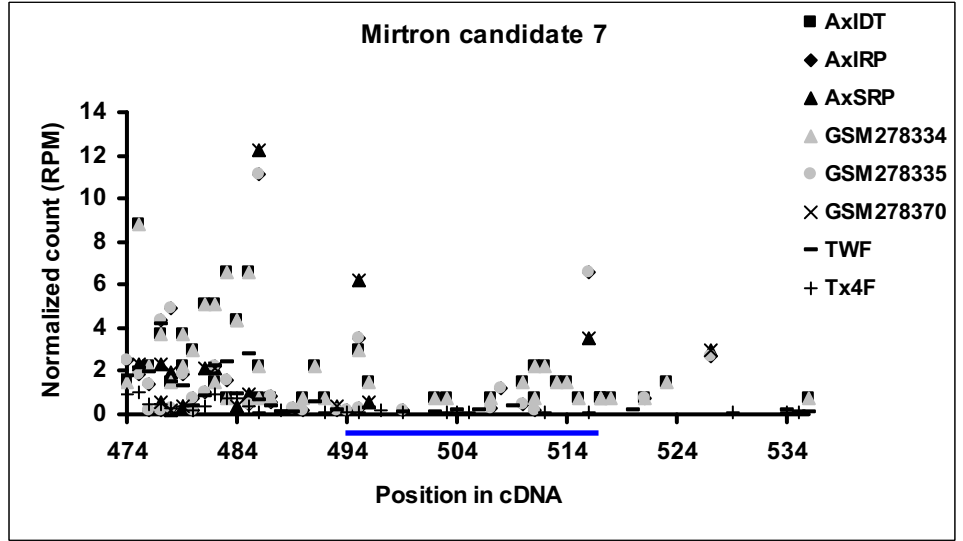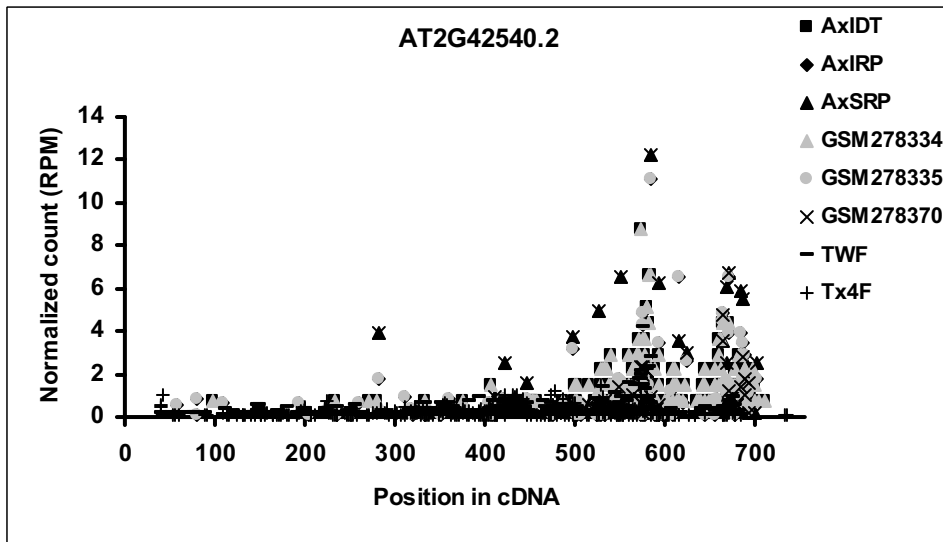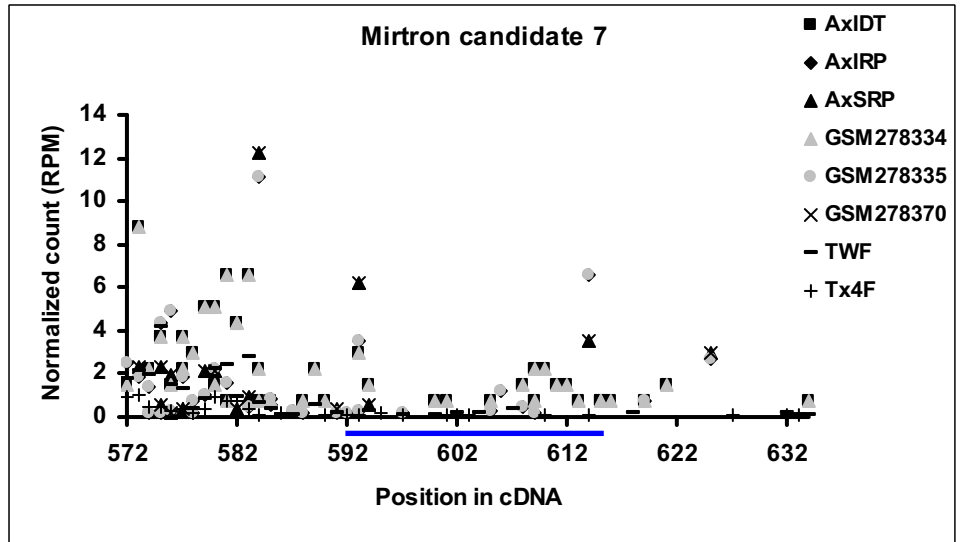

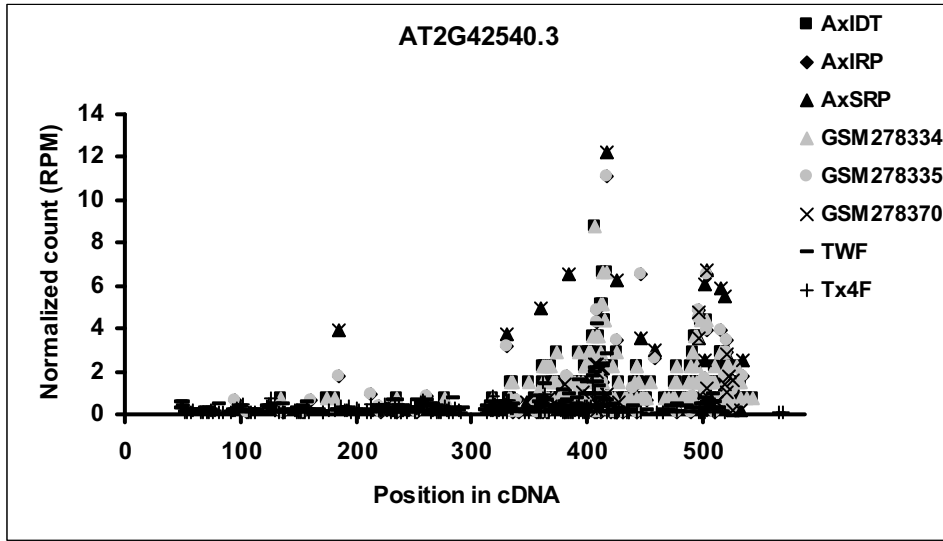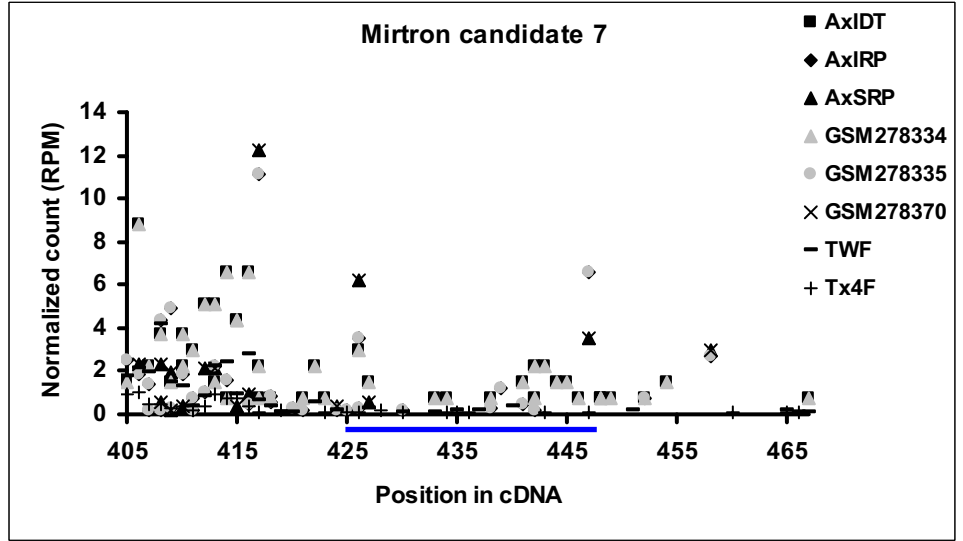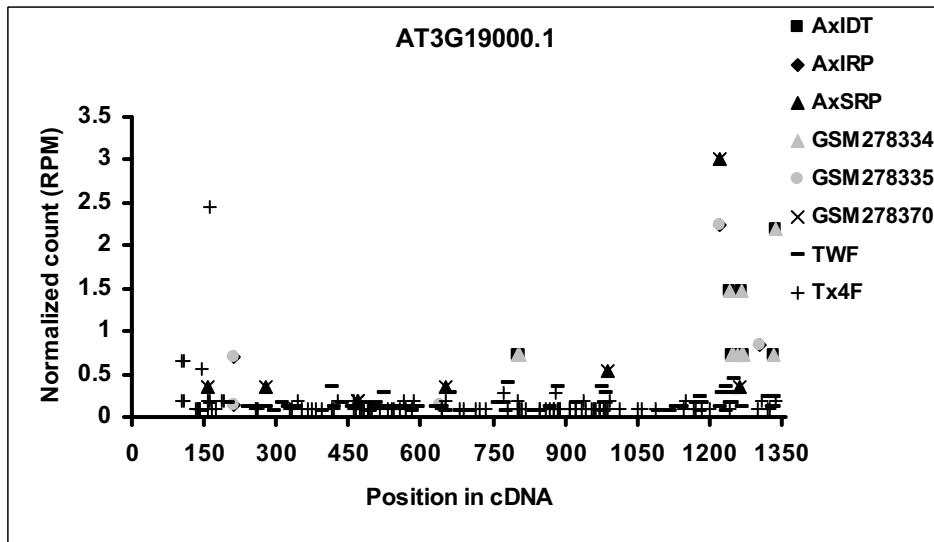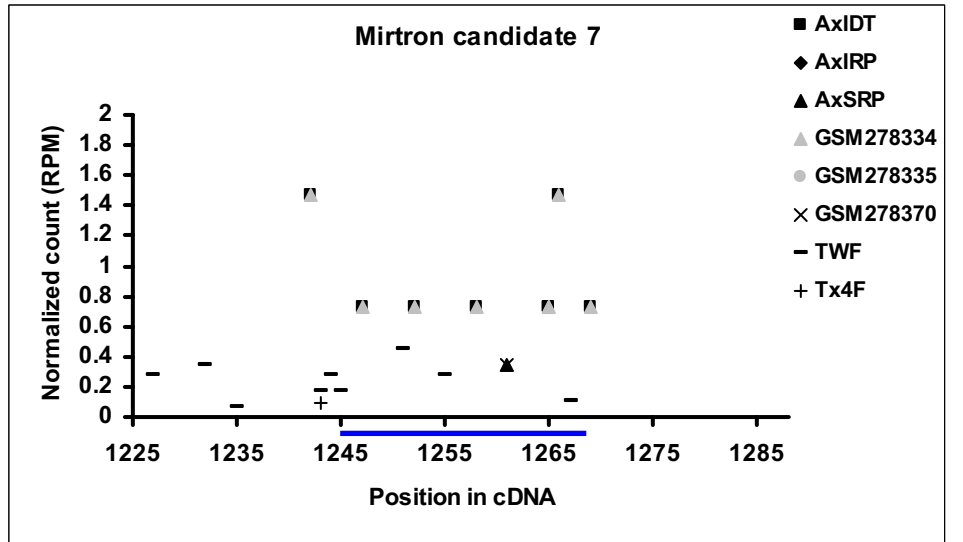

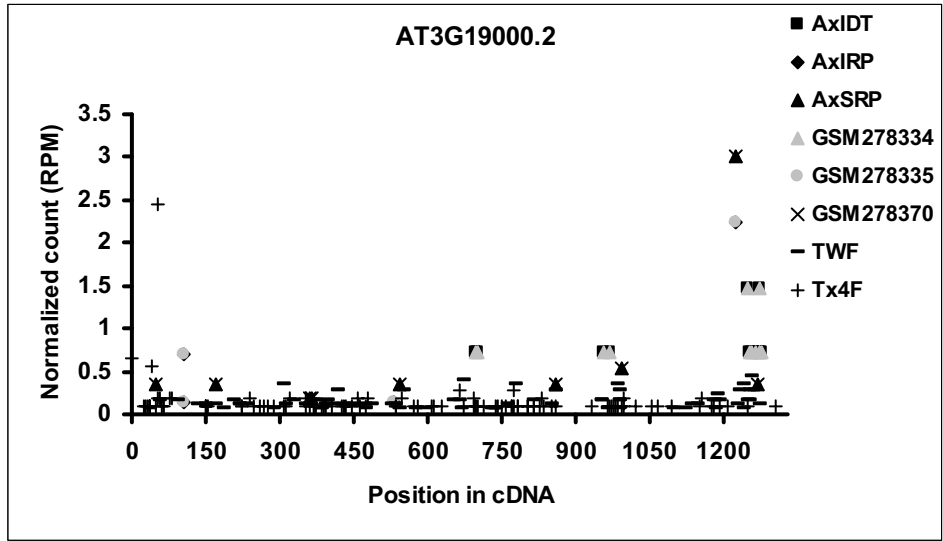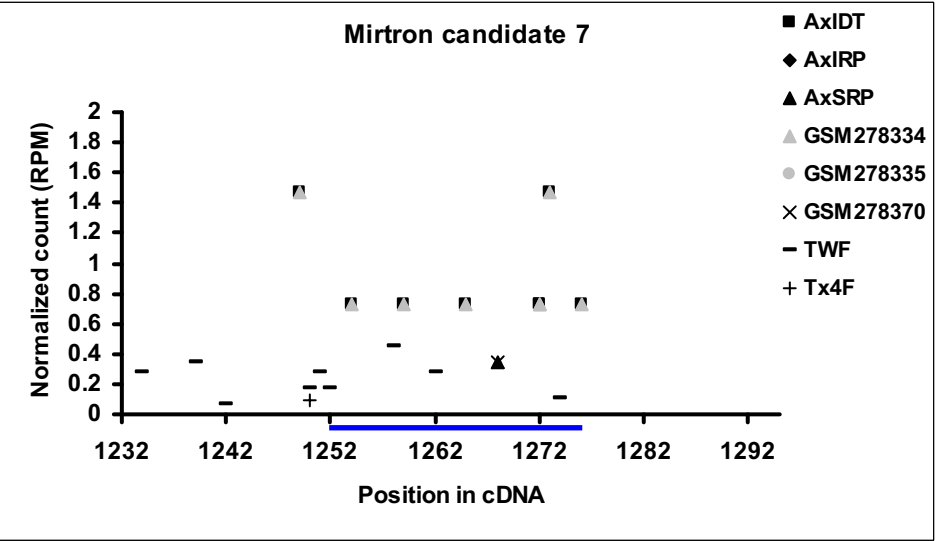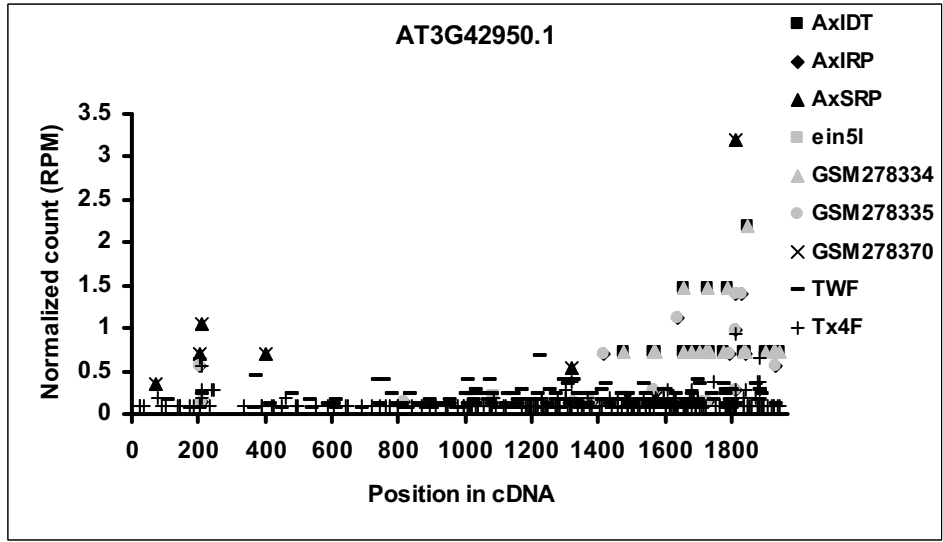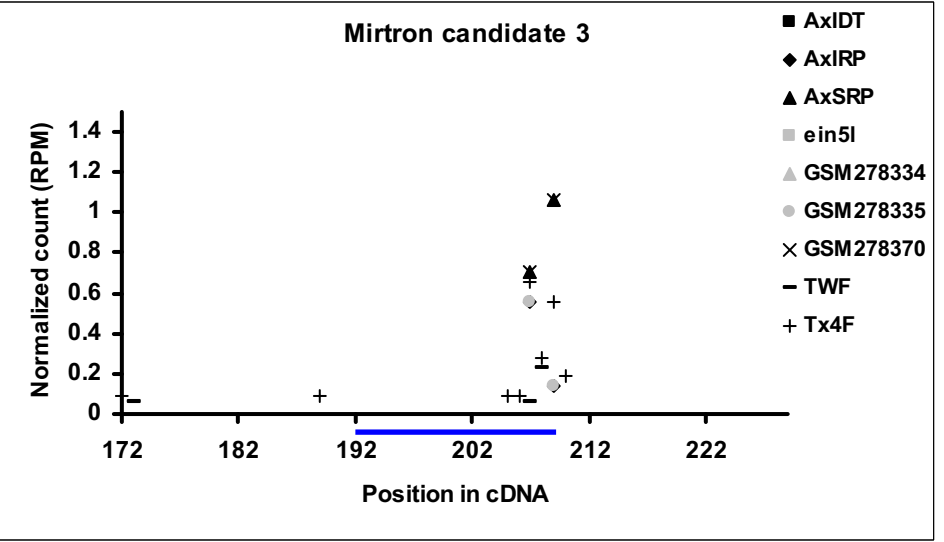

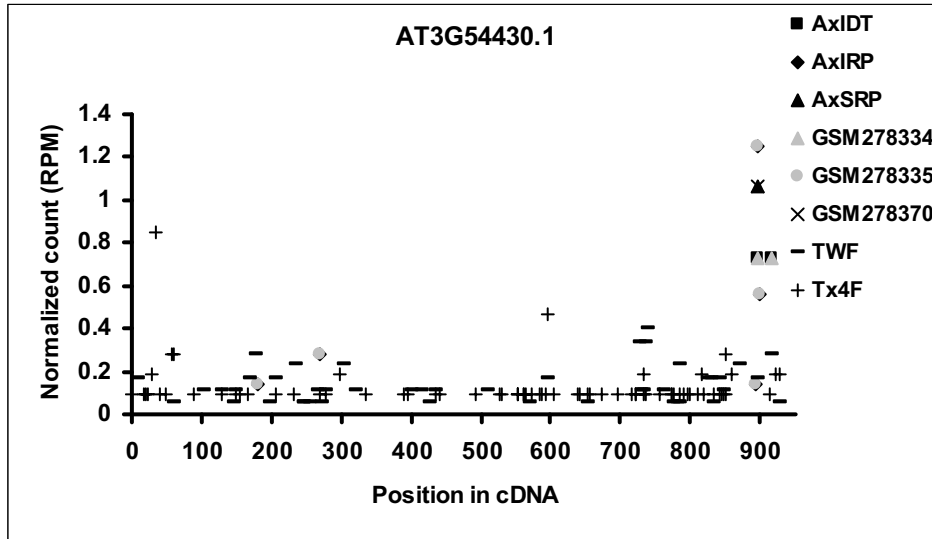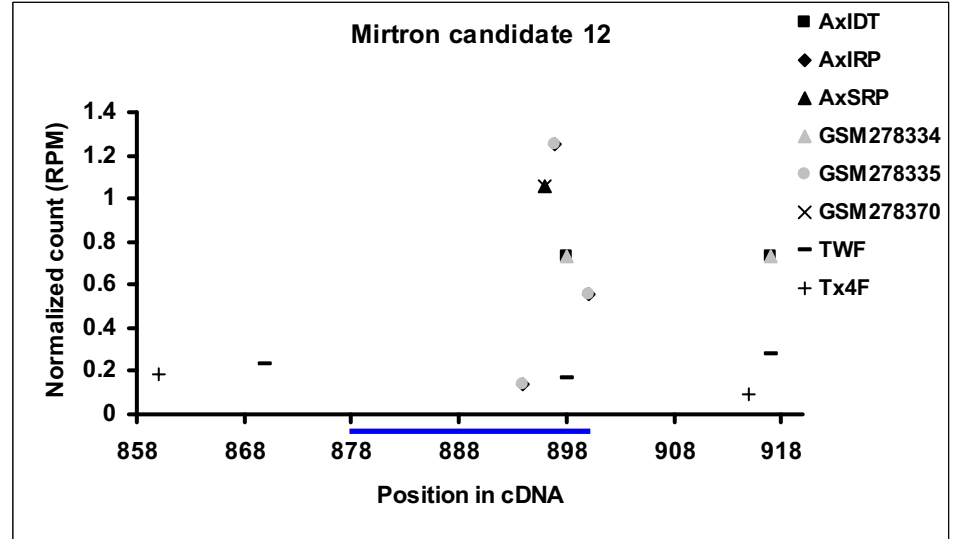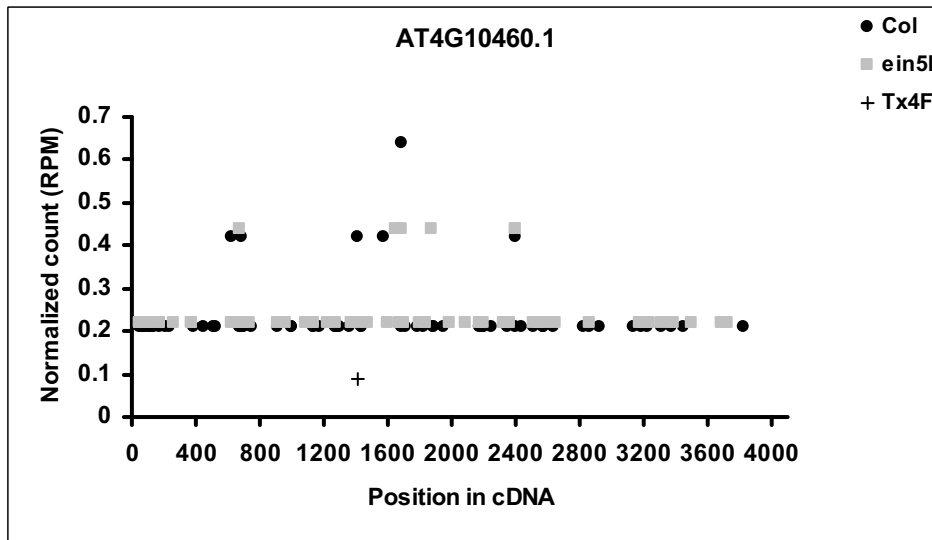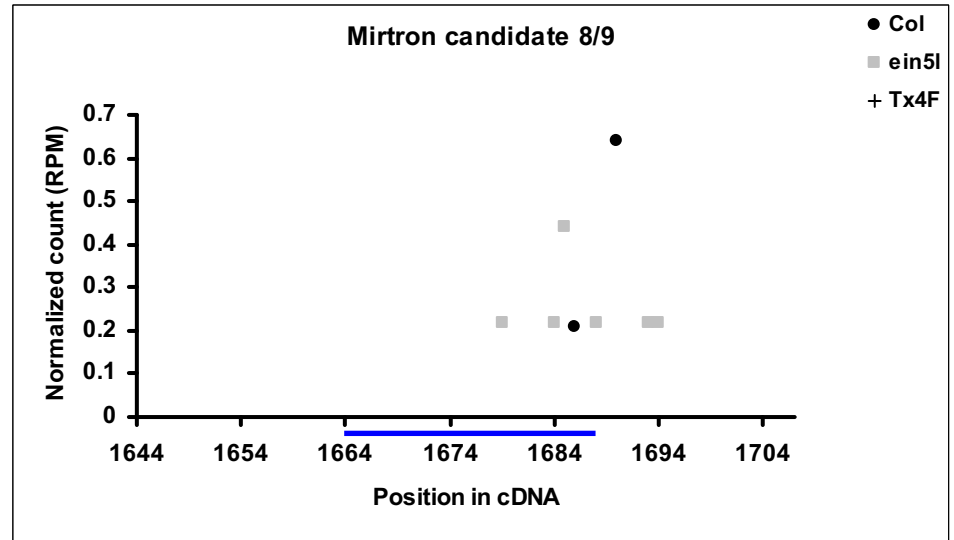



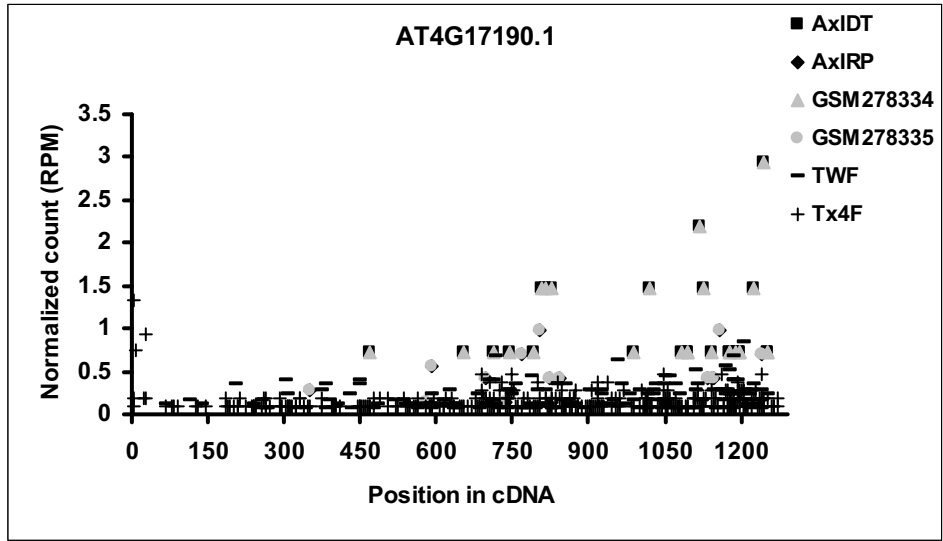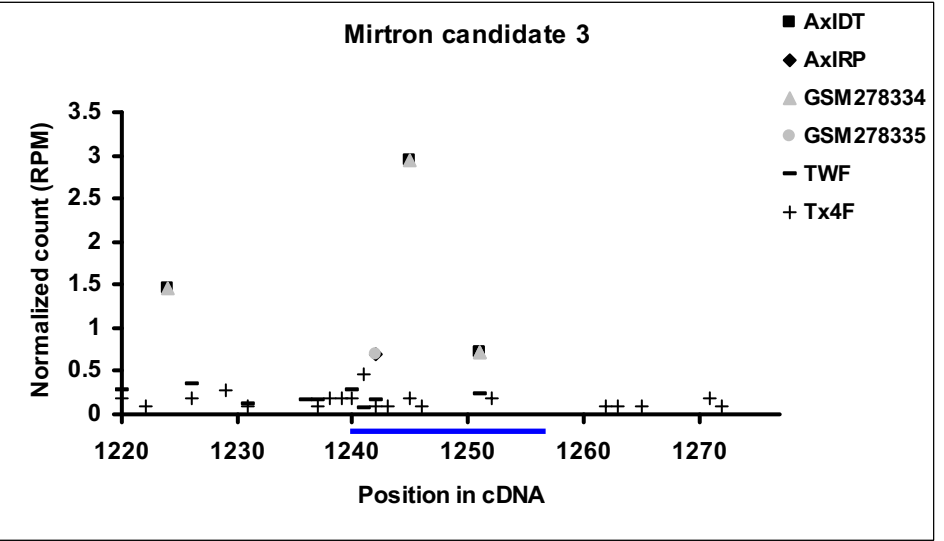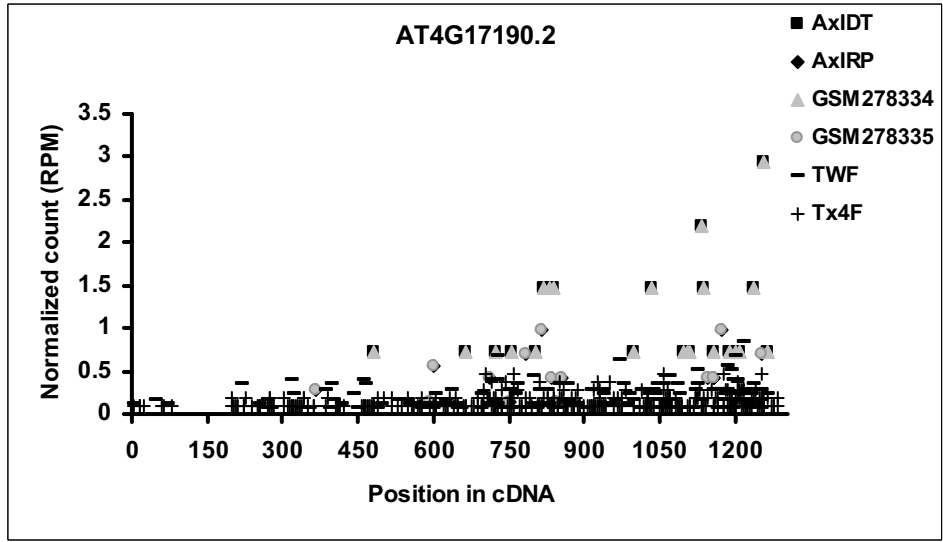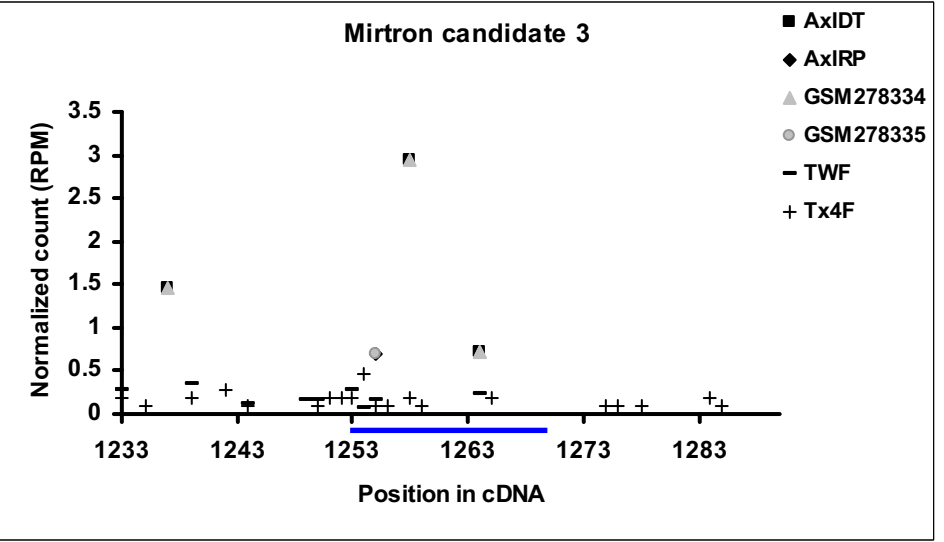

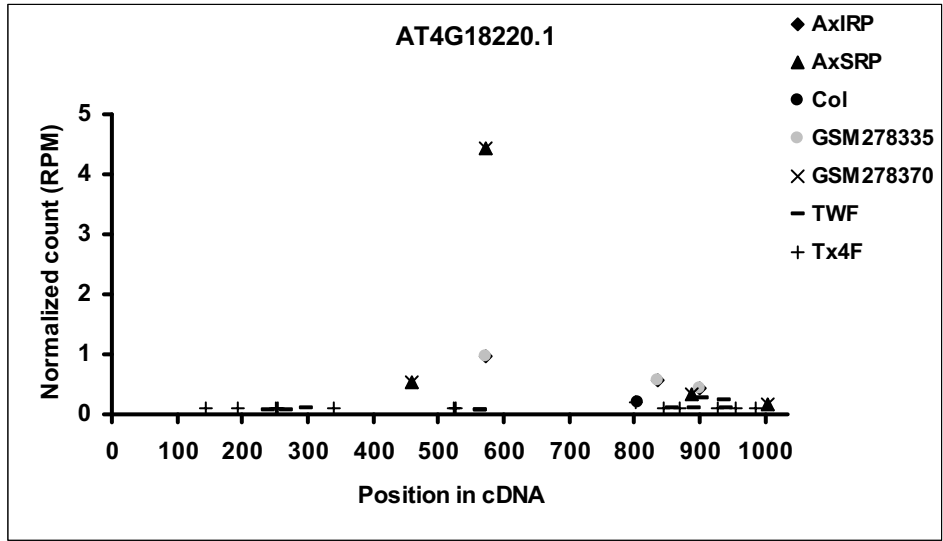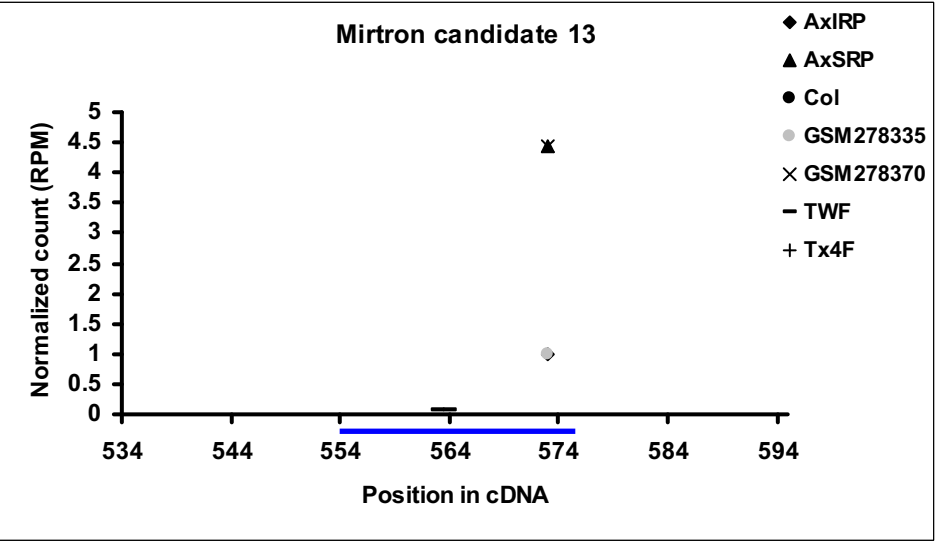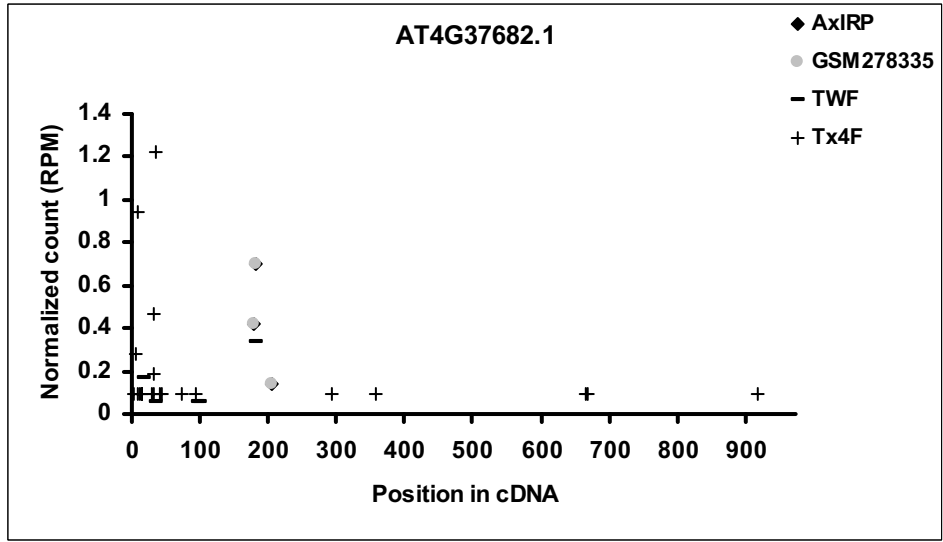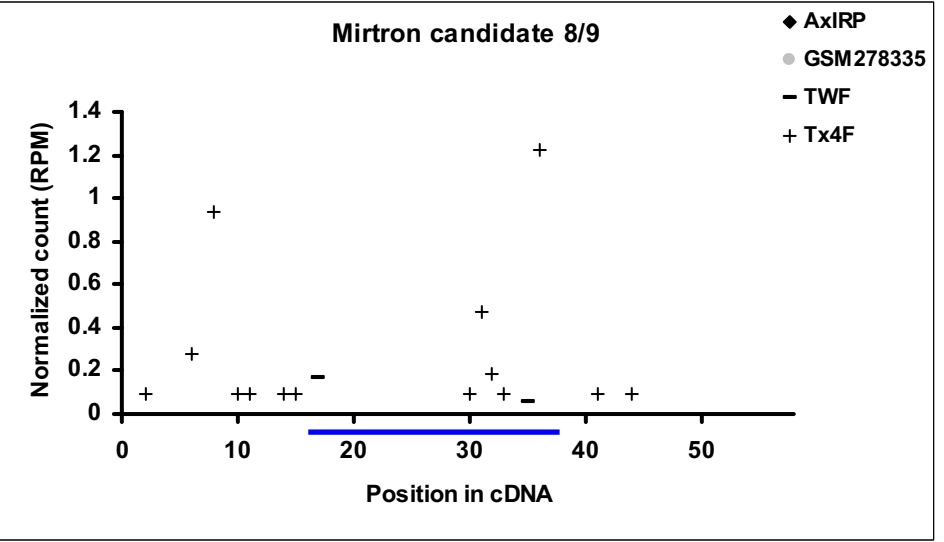

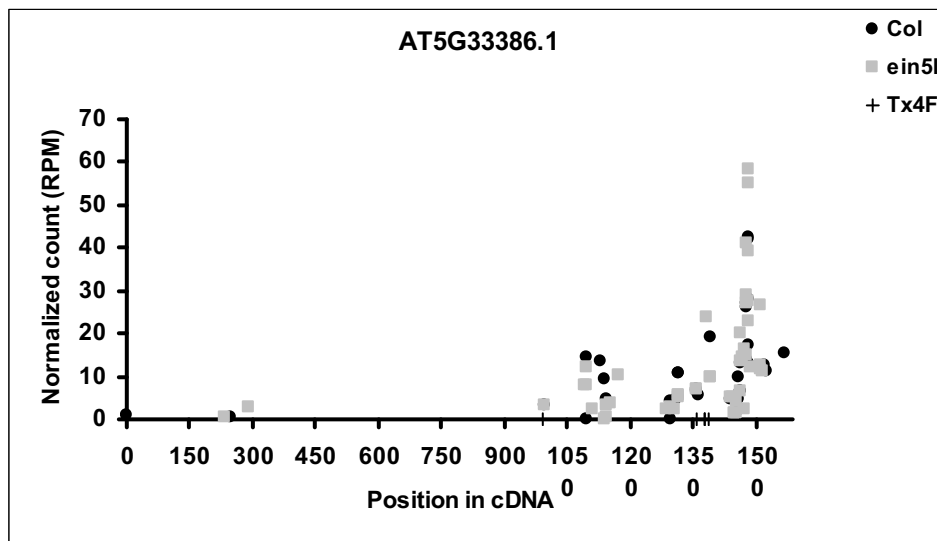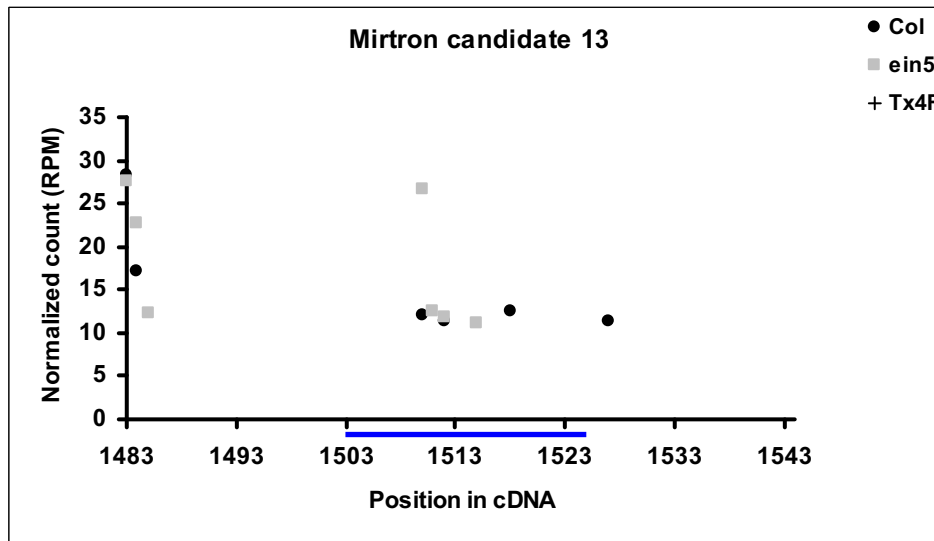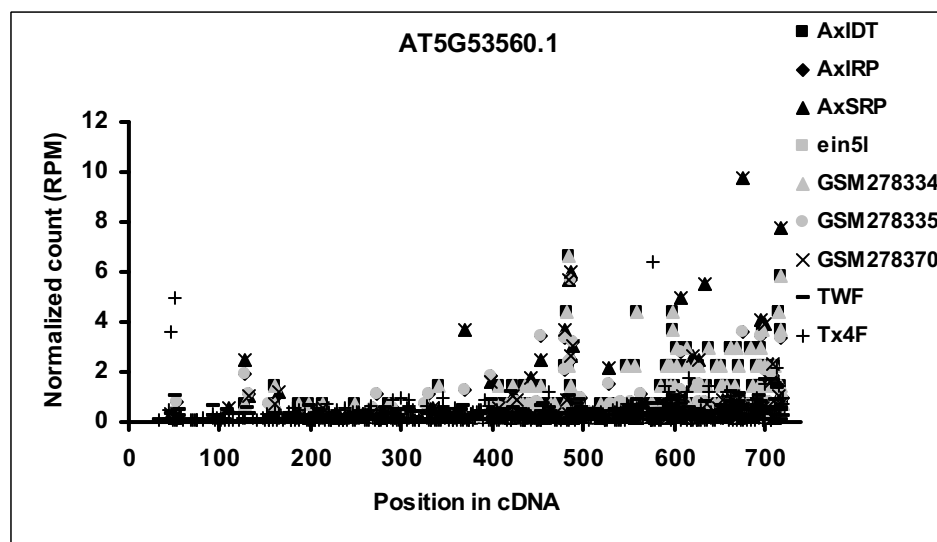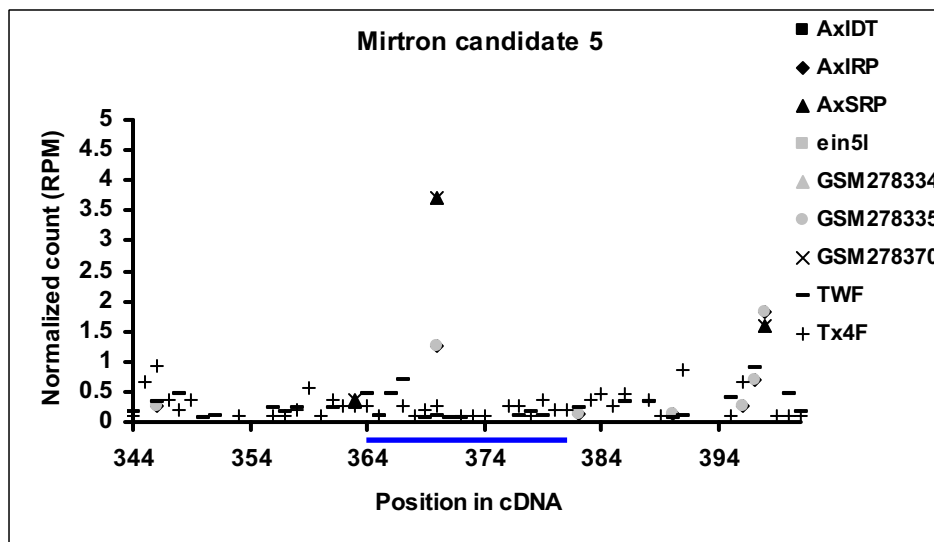

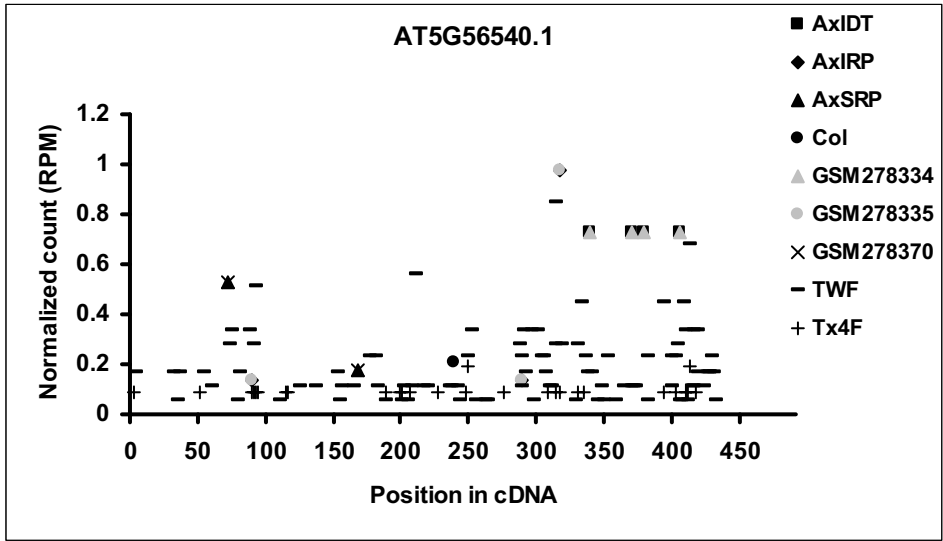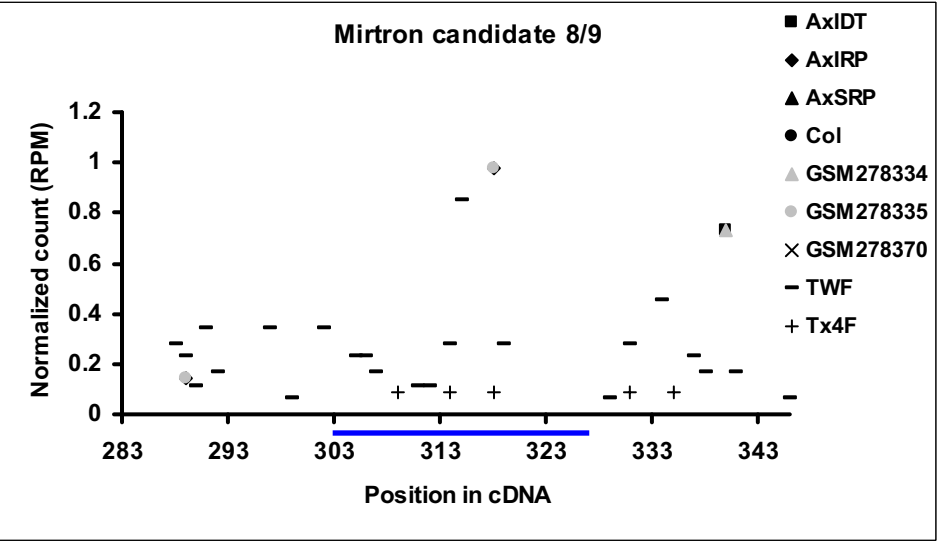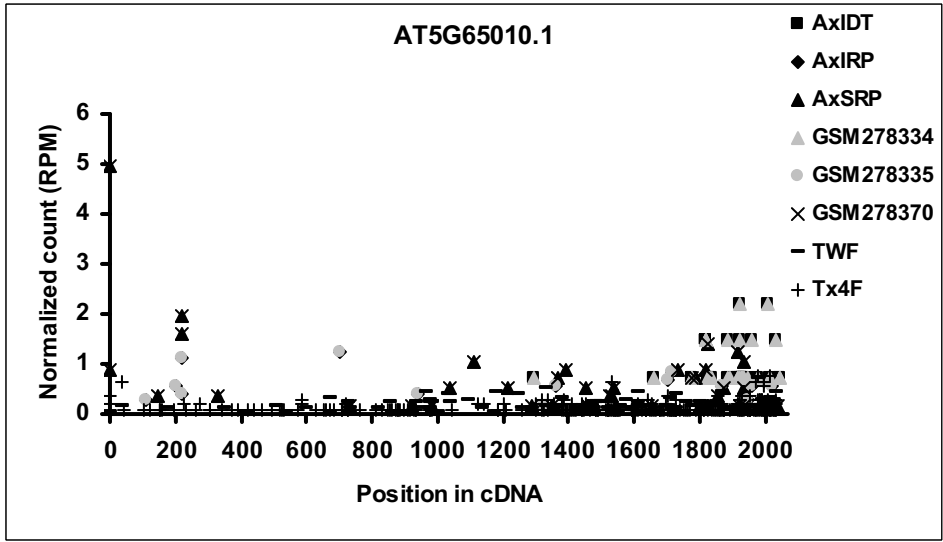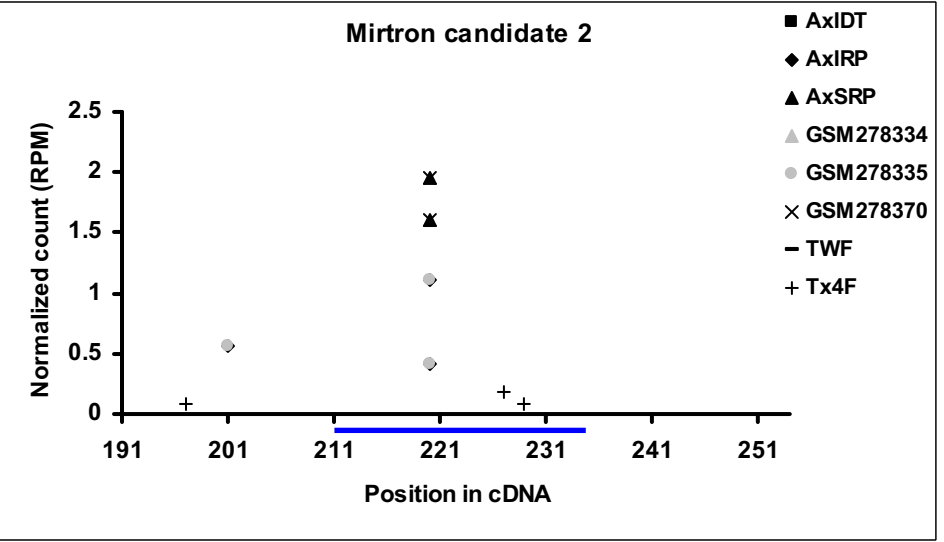

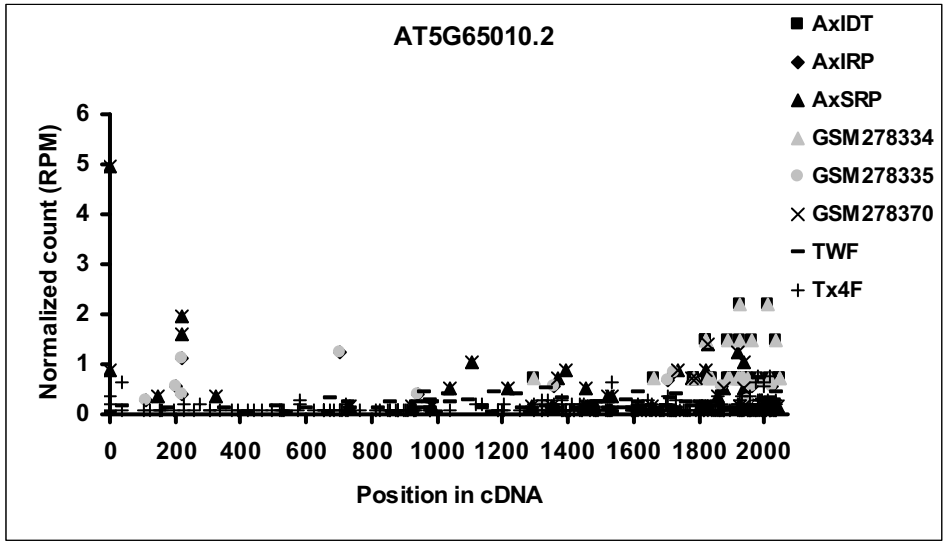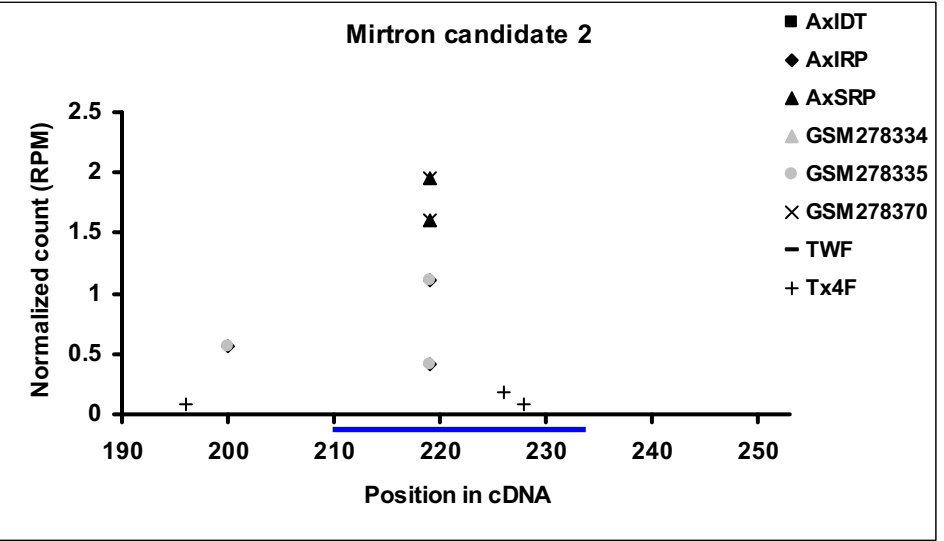

Supplement: pone.0031163.s003.pdf [file pone.0031163.s003.pdf]
