# Supplementary material for: Large-Scale Identification of Mirtrons in Arabidopsis and Rice
Source: PubMed Central journal article supplement (PMC3278437; doi:10.1371/journal.pone.0031163), 2012-02-13
Supplement: pone.0031163.s006.pdf [file pone.0031163.s006.pdf]

**Table S2** Plant degradome sequencing data sets used in this study

| <b>Species</b>              | <b>Data sets</b>                           | <b>Sources</b>      |
|-----------------------------|--------------------------------------------|---------------------|
| <i>Arabidopsis thaliana</i> | GSM278333; GSM278334; GSM278335; GSM278370 | GEO <sup>a</sup>    |
|                             | AxIDT; AxIRP; AxSRP; Col; ein5l; TWF; Tx4F | NGSDBs <sup>b</sup> |
| <i>Oryza sativa</i>         | GSM434596; GSM455938; GSM455939; GSM476257 | GEO <sup>a</sup>    |

<sup>a</sup>GEO (Gene Expression Omnibus), <http://www.ncbi.nlm.nih.gov/geo/>

<sup>b</sup>NGSDBs (Next-Gen Sequence Databases), <http://mpss.udel.edu/>
